# Supplementary material for: Deciphering the mode of action of the processive polysaccharide modifying enzyme dermatan sulfate epimerase 1 by hydrogen–deuterium exchange mass spectrometry
Source: Chem Sci. 2015 Nov 30;7(2):1447–56. doi: 10.1039/c5sc03798k (PMC4755500; doi:10.1039/c5sc03798k)
Supplement: Supplementary file 2 [file SC-007-C5SC03798K-s002.xlsx]

## Sheet: Sheet1
id	name	comment	unmod	off_rate	delta	rate_score	polymer12_score	polymer14_score	polymer16_score	polymer18_score	frag3_score	frag5_score	frag7_score	frag9_score	frag11_score	frag13_score	insert_date	timestamp	Score
380	01_red_delta_90_8		0	0	0	0.94961	0.927577	0.990999	0.993257	0.990298	0	1	1	0.974254	0.795571	0.765417	2015-09-16	2015-09-25 11:38:44	7.38698
292	01_red_delta_87_13		0	0	0	0.944018	0.923904	0.995642	0.99548	0.97748	0	1	1	0.996392	0.739399	0.813784	2015-09-16	2015-09-25 11:38:44	7.3861
411	01_red_delta_91_8		0	0	0	0.959736	0.909232	0.996802	0.987406	0.935512	0	1	1	0.98948	0.792117	0.775813	2015-09-16	2015-09-25 11:38:44	7.3461
321	01_red_delta_88_11		0	0	0	0.949616	0.885211	0.981978	0.992809	0.98323	0	1	1	0.990934	0.754943	0.804764	2015-09-16	2015-09-25 11:38:44	7.34348
199	01_red_delta_84_13		0	0	0	0.941739	0.942793	0.978816	0.994908	0.981567	0	1	1	0.97858	0.780135	0.740389	2015-09-16	2015-09-25 11:38:44	7.33893
205	01_red_delta_84_19		0	0	0	0.938272	0.93667	0.978923	0.992798	0.971398	0	1	1	0.988022	0.752196	0.780307	2015-09-16	2015-09-25 11:38:44	7.33859
288	01_red_delta_87_9		0	0	0	0.957517	0.894398	0.990989	0.993446	0.981347	0	1	1	0.989746	0.716766	0.813085	2015-09-16	2015-09-25 11:38:44	7.33729
319	01_red_delta_88_9		0	0	0	0.954671	0.939241	0.987868	0.95506	0.955182	0	1	1	0.992	0.707935	0.84396	2015-09-16	2015-09-25 11:38:44	7.33592
473	01_red_delta_93_8		0	0	0	0.952164	0.923628	0.948667	0.975835	0.968965	0	1	1	0.980431	0.668017	0.917828	2015-09-16	2015-09-25 11:38:44	7.33554
238	01_red_delta_85_21		0	0	0	0.919002	0.945115	0.992386	0.999076	0.976897	0	1	1	0.997169	0.772962	0.732522	2015-09-16	2015-09-25 11:38:44	7.33513
143	01_red_delta_82_19		0	0	0	0.920036	0.960098	0.984536	0.993456	0.97856	0	1	1	0.997046	0.754761	0.746158	2015-09-16	2015-09-25 11:38:44	7.33465
172	01_red_delta_83_17		0	0	0	0.924838	0.942243	0.982821	0.991965	0.974713	0	1	1	0.988881	0.784852	0.741483	2015-09-16	2015-09-25 11:38:44	7.3318
204	01_red_delta_84_18		0	0	0	0.92169	0.948946	0.983656	0.997472	0.967207	0	1	1	0.997683	0.76489	0.750244	2015-09-16	2015-09-25 11:38:44	7.33179
196	01_red_delta_84_10		0	0	0	0.948274	0.955752	0.983173	0.965709	0.987363	0	1	1	0.979887	0.770824	0.739265	2015-09-16	2015-09-25 11:38:44	7.33025
225	01_red_delta_85_8		0	0	0	0.947425	0.964047	0.979363	0.966643	0.968225	0	1	1	0.998637	0.785354	0.719435	2015-09-16	2015-09-25 11:38:44	7.32913
314	01_red_delta_88_4		0	0	0	0.9686	0.950066	0.967908	0.96447	0.990634	0	1	1	0.989279	0.8317	0.663505	2015-09-16	2015-09-25 11:38:44	7.32616
286	01_red_delta_87_7		0	0	0	0.949036	0.958113	0.991789	0.977657	0.988639	0	1	1	0.961509	0.698763	0.79843	2015-09-16	2015-09-25 11:38:44	7.32394
175	01_red_delta_83_20		0	0	0	0.94126	0.924152	0.989766	0.994068	0.973664	0	1	1	0.99379	0.770611	0.732142	2015-09-16	2015-09-25 11:38:44	7.31945
146	01_red_delta_82_22		0	0	0	0.918984	0.956125	0.994951	0.993757	0.958241	0	1	1	0.998273	0.72817	0.767477	2015-09-16	2015-09-25 11:38:44	7.31598
254	01_red_delta_86_6		0	0	0	0.953833	0.935798	0.959876	0.994509	0.978473	0	1	1	0.99912	0.822265	0.668131	2015-09-16	2015-09-25 11:38:44	7.312
261	01_red_delta_86_13		0	0	0	0.944128	0.946265	0.994152	0.987125	0.96763	0	1	1	0.990009	0.706769	0.774997	2015-09-16	2015-09-25 11:38:44	7.31107
345	01_red_delta_89_4		0	0	0	0.967603	0.92195	0.973587	0.986585	0.979662	0	1	1	0.963635	0.746044	0.770803	2015-09-16	2015-09-25 11:38:44	7.30987
108	01_red_delta_81_15		0	0	0	0.936238	0.942005	0.980617	0.98871	0.977731	0	1	1	0.999549	0.756326	0.727194	2015-09-16	2015-09-25 11:38:44	7.30837
407	01_red_delta_91_4		0	0	0	0.961834	0.918718	0.999093	0.952595	0.966894	0	1	1	0.949482	0.73493	0.823178	2015-09-16	2015-09-25 11:38:44	7.30672
376	01_red_delta_90_4		0	0	0	0.95998	0.925998	0.987577	0.963853	0.968815	0	1	1	0.988908	0.752876	0.755709	2015-09-16	2015-09-25 11:38:44	7.30371
383	01_red_delta_90_11		0	0	0	0.961608	0.887182	0.979778	0.95164	0.943607	0	1	1	0.988947	0.812031	0.778228	2015-09-16	2015-09-25 11:38:44	7.30302
229	01_red_delta_85_12		0	0	0	0.92315	0.948743	0.995593	0.996703	0.968612	0	1	1	0.996117	0.684704	0.789069	2015-09-16	2015-09-25 11:38:44	7.30269
348	01_red_delta_89_7		0	0	0	0.951635	0.922207	0.989348	0.989506	0.959144	0	1	1	0.951531	0.7178	0.816256	2015-09-16	2015-09-25 11:38:44	7.29743
290	01_red_delta_87_11		0	0	0	0.950881	0.901235	0.976624	0.971965	0.979613	0	1	1	0.996817	0.768114	0.751988	2015-09-16	2015-09-25 11:38:44	7.29724
114	01_red_delta_81_21		0	0	0	0.911884	0.956178	0.992186	0.997376	0.969748	0	1	1	0.999668	0.737639	0.732453	2015-09-16	2015-09-25 11:38:44	7.29713
202	01_red_delta_84_16		0	0	0	0.932516	0.932261	0.982079	0.978252	0.974545	0	1	1	0.994012	0.763148	0.738997	2015-09-16	2015-09-25 11:38:44	7.29581
260	01_red_delta_86_12		0	0	0	0.936017	0.929398	0.981836	0.987246	0.976994	0	1	1	0.988417	0.786345	0.709332	2015-09-16	2015-09-25 11:38:44	7.29559
441	01_red_delta_92_7		0	0	0	0.960005	0.939155	0.993418	0.990379	0.914735	0	1	1	0.939677	0.711859	0.845895	2015-09-16	2015-09-25 11:38:44	7.29512
347	01_red_delta_89_6		0	0	0	0.959345	0.882919	0.989558	0.983138	0.977655	0	1	1	0.982228	0.723967	0.794317	2015-09-16	2015-09-25 11:38:44	7.29313
442	01_red_delta_92_8		0	0	0	0.957714	0.914414	0.956083	0.98068	0.923489	0	1	1	0.970817	0.745561	0.839799	2015-09-16	2015-09-25 11:38:44	7.28856
99	01_red_delta_81_6		0	0	0	0.96627	0.958415	0.972068	0.962362	0.922865	0	1	1	0.999346	0.836985	0.669394	2015-09-16	2015-09-25 11:38:44	7.2877
257	01_red_delta_86_9		0	0	0	0.949686	0.964137	0.940851	0.982209	0.992757	0	1	1	0.998079	0.760252	0.699256	2015-09-16	2015-09-25 11:38:44	7.28723
103	01_red_delta_81_10		0	0	0	0.940199	0.961889	0.988615	0.97675	0.980001	0	1	1	0.999969	0.691036	0.747864	2015-09-16	2015-09-25 11:38:44	7.28632
231	01_red_delta_85_14		0	0	0	0.924983	0.927146	0.993726	0.990671	0.983027	0	1	1	0.993507	0.65052	0.822578	2015-09-16	2015-09-25 11:38:44	7.28616
315	01_red_delta_88_5		0	0	0	0.962494	0.941233	0.990937	0.972274	0.957888	0	1	1	0.988837	0.714991	0.757071	2015-09-16	2015-09-25 11:38:44	7.28573
262	01_red_delta_86_14		0	0	0	0.921629	0.930444	0.991547	0.993344	0.951406	0	1	1	0.994733	0.683007	0.818251	2015-09-16	2015-09-25 11:38:44	7.28436
412	01_red_delta_91_9		0	0	0	0.947725	0.914274	0.976527	0.991468	0.988576	0	1	1	0.948506	0.655356	0.860879	2015-09-16	2015-09-25 11:38:44	7.28331
268	01_red_delta_86_20		0	0	0	0.919185	0.928437	0.99074	0.997458	0.974143	0	1	1	0.979618	0.687068	0.806176	2015-09-16	2015-09-25 11:38:44	7.28282
176	01_red_delta_83_21		0	0	0	0.908554	0.908673	0.993518	0.98521	0.978844	0	1	1	0.994707	0.745563	0.764132	2015-09-16	2015-09-25 11:38:44	7.2792
320	01_red_delta_88_10		0	0	0	0.935848	0.918858	0.991829	0.992104	0.974908	0	1	1	0.989443	0.626022	0.847181	2015-09-16	2015-09-25 11:38:44	7.27619
136	01_red_delta_82_12		0	0	0	0.921894	0.954446	0.994338	0.982555	0.955913	0	1	1	0.994972	0.708633	0.762589	2015-09-16	2015-09-25 11:38:44	7.27534
344	01_red_delta_89_3		0	0	0	0.964179	0.948033	0.99403	0.945199	0.950981	0	1	1	0.990905	0.731784	0.750164	2015-09-16	2015-09-25 11:38:44	7.27528
107	01_red_delta_81_14		0	0	0	0.91388	0.95083	0.972339	0.995436	0.975148	0	1	1	0.99675	0.771942	0.698791	2015-09-16	2015-09-25 11:38:44	7.27512
203	01_red_delta_84_17		0	0	0	0.915079	0.923691	0.992722	0.988114	0.98034	0	1	1	0.986604	0.721716	0.766706	2015-09-16	2015-09-25 11:38:44	7.27497
112	01_red_delta_81_19		0	0	0	0.902934	0.968255	0.992449	0.996369	0.968367	0	1	1	0.998435	0.707225	0.7409	2015-09-16	2015-09-25 11:38:44	7.27493
291	01_red_delta_87_12		0	0	0	0.939487	0.924027	0.983279	0.992533	0.977525	0	1	1	0.941893	0.74746	0.768558	2015-09-16	2015-09-25 11:38:44	7.27476
284	01_red_delta_87_5		0	0	0	0.961781	0.948374	0.966001	0.928788	0.970655	0	1	1	0.999974	0.797082	0.701393	2015-09-16	2015-09-25 11:38:44	7.27405
381	01_red_delta_90_9		0	0	0	0.958797	0.954317	0.954997	0.970728	0.969442	0	1	1	0.975538	0.653146	0.837011	2015-09-16	2015-09-25 11:38:44	7.27398
258	01_red_delta_86_10		0	0	0	0.941163	0.908906	0.975205	0.981728	0.972916	0	1	1	0.955098	0.76763	0.769667	2015-09-16	2015-09-25 11:38:44	7.27231
82	01_red_delta_80_20		0	0	0	0.908245	0.949956	0.994229	0.990912	0.965989	0	1	1	0.99185	0.708212	0.759995	2015-09-16	2015-09-25 11:38:44	7.26939
104	01_red_delta_81_11		0	0	0	0.927733	0.952036	0.99614	0.969252	0.980018	0	1	1	0.998497	0.667691	0.773105	2015-09-16	2015-09-25 11:38:44	7.26447
171	01_red_delta_83_16		0	0	0	0.920927	0.922956	0.981374	0.985485	0.981467	0	1	1	0.998408	0.706515	0.763221	2015-09-16	2015-09-25 11:38:44	7.26035
145	01_red_delta_82_21		0	0	0	0.927114	0.900247	0.990125	0.989829	0.960994	0	1	1	0.994707	0.778152	0.718807	2015-09-16	2015-09-25 11:38:44	7.25997
263	01_red_delta_86_15		0	0	0	0.915828	0.955135	0.992003	0.980724	0.96444	0	1	1	0.968108	0.666267	0.817329	2015-09-16	2015-09-25 11:38:44	7.25983
264	01_red_delta_86_16		0	0	0	0.914383	0.908685	0.988498	0.997875	0.973689	0	1	1	0.996398	0.664782	0.815153	2015-09-16	2015-09-25 11:38:44	7.25946
503	01_red_delta_94_7		0	0	0	0.958322	0.903538	0.990935	0.968725	0.891448	0	1	1	0.957162	0.729538	0.859281	2015-09-16	2015-09-25 11:38:44	7.25895
323	01_red_delta_88_13		0	0	0	0.931357	0.900953	0.990071	0.990993	0.977939	0	1	1	0.994019	0.622239	0.850102	2015-09-16	2015-09-25 11:38:44	7.25767
80	01_red_delta_80_18		0	0	0	0.904373	0.938721	0.983983	0.989	0.975548	0	1	1	0.995472	0.73957	0.730274	2015-09-16	2015-09-25 11:38:44	7.25694
440	01_red_delta_92_6		0	0	0	0.96977	0.85625	0.980374	0.979189	0.959094	0	1	1	0.962083	0.744685	0.804942	2015-09-16	2015-09-25 11:38:44	7.25639
444	01_red_delta_92_10		0	0	0	0.962586	0.847156	0.990522	0.981195	0.919025	0	1	1	0.939225	0.786393	0.829761	2015-09-16	2015-09-25 11:38:44	7.25586
256	01_red_delta_86_8		0	0	0	0.943176	0.905603	0.98146	0.98477	0.983177	0	1	1	0.997389	0.769227	0.690765	2015-09-16	2015-09-25 11:38:44	7.25557
169	01_red_delta_83_14		0	0	0	0.930385	0.957383	0.961224	0.983002	0.969805	0	1	1	0.974005	0.782212	0.69361	2015-09-16	2015-09-25 11:38:44	7.25163
326	01_red_delta_88_16		0	0	0	0.933129	0.887717	0.986685	0.975239	0.980718	0	1	1	0.962342	0.722605	0.802658	2015-09-16	2015-09-25 11:38:44	7.25109
352	01_red_delta_89_11		0	0	0	0.941694	0.903946	0.990257	0.993234	0.932619	0	1	1	0.941804	0.699553	0.847489	2015-09-16	2015-09-25 11:38:44	7.2506
144	01_red_delta_82_20		0	0	0	0.89253	0.947148	0.993017	0.995239	0.980214	0	1	1	0.999105	0.651313	0.791125	2015-09-16	2015-09-25 11:38:44	7.24969
195	01_red_delta_84_9		0	0	0	0.927849	0.957975	0.995301	0.953621	0.940323	0	1	1	0.999384	0.70554	0.768243	2015-09-16	2015-09-25 11:38:44	7.24824
201	01_red_delta_84_15		0	0	0	0.919283	0.940631	0.993328	0.972447	0.971437	0	1	1	0.999908	0.666102	0.784365	2015-09-16	2015-09-25 11:38:44	7.2475
165	01_red_delta_83_10		0	0	0	0.926843	0.954936	0.978916	0.98608	0.983577	0	1	1	0.996623	0.671931	0.747483	2015-09-16	2015-09-25 11:38:44	7.24639
200	01_red_delta_84_14		0	0	0	0.919299	0.926854	0.981852	0.994085	0.9543	0	1	1	0.999701	0.705214	0.764481	2015-09-16	2015-09-25 11:38:44	7.24579
228	01_red_delta_85_11		0	0	0	0.945614	0.915776	0.988055	0.976667	0.978424	0	1	1	0.982547	0.703597	0.755039	2015-09-16	2015-09-25 11:38:44	7.24572
232	01_red_delta_85_15		0	0	0	0.92343	0.936578	0.987495	0.995227	0.974429	0	1	1	0.947343	0.732733	0.747401	2015-09-16	2015-09-25 11:38:44	7.24464
235	01_red_delta_85_18		0	0	0	0.907555	0.915526	0.992625	0.993037	0.982185	0	1	1	0.997762	0.690804	0.764899	2015-09-16	2015-09-25 11:38:44	7.24439
443	01_red_delta_92_9		0	0	0	0.948873	0.904409	0.984185	0.993832	0.941451	0	1	1	0.983355	0.64122	0.846368	2015-09-16	2015-09-25 11:38:44	7.24369
501	01_red_delta_94_5		0	0	0	0.972397	0.900407	0.990345	0.937734	0.865785	0	1	1	0.937623	0.825569	0.81324	2015-09-16	2015-09-25 11:38:44	7.2431
142	01_red_delta_82_18		0	0	0	0.898543	0.942491	0.994201	0.990073	0.971957	0	1	1	0.999908	0.650878	0.794423	2015-09-16	2015-09-25 11:38:44	7.24247
312	01_red_delta_88_2		0	0	0	0.970058	0.938437	0.971569	0.920868	0.97188	0	1	1	0.96795	0.840576	0.660879	2015-09-16	2015-09-25 11:38:44	7.24222
178	01_red_delta_83_23		0	0	0	0.88622	0.919967	0.990537	0.998422	0.976877	0	1	1	0.98571	0.722731	0.760958	2015-09-16	2015-09-25 11:38:44	7.24142
322	01_red_delta_88_12		0	0	0	0.922881	0.921099	0.991955	0.974114	0.978819	0	1	1	0.998018	0.62144	0.831373	2015-09-16	2015-09-25 11:38:44	7.2397
325	01_red_delta_88_15		0	0	0	0.923178	0.90802	0.98111	0.986775	0.966368	0	1	1	0.999509	0.608351	0.865696	2015-09-16	2015-09-25 11:38:44	7.23901
224	01_red_delta_85_7		0	0	0	0.954935	0.921001	0.966192	0.982564	0.969306	0	1	1	0.997224	0.763815	0.680145	2015-09-16	2015-09-25 11:38:44	7.23518
384	01_red_delta_90_12		0	0	0	0.940423	0.908366	0.968758	0.973645	0.94311	0	1	1	0.983512	0.631571	0.885087	2015-09-16	2015-09-25 11:38:44	7.23447
207	01_red_delta_84_21		0	0	0	0.915815	0.896434	0.986116	0.98253	0.975666	0	1	1	0.996973	0.702946	0.774236	2015-09-16	2015-09-25 11:38:44	7.23072
77	01_red_delta_80_15		0	0	0	0.913478	0.964206	0.990507	0.974071	0.976924	0	1	1	0.975975	0.684356	0.750993	2015-09-16	2015-09-25 11:38:44	7.23051
139	01_red_delta_82_15		0	0	0	0.90837	0.959442	0.99333	0.979952	0.956527	0	1	1	0.99912	0.659552	0.774209	2015-09-16	2015-09-25 11:38:44	7.2305
285	01_red_delta_87_6		0	0	0	0.952738	0.900127	0.989015	0.970253	0.981913	0	1	1	0.994067	0.709439	0.732891	2015-09-16	2015-09-25 11:38:44	7.23044
177	01_red_delta_83_22		0	0	0	0.886257	0.94387	0.985146	0.994298	0.974938	0	1	1	0.975538	0.682254	0.788108	2015-09-16	2015-09-25 11:38:44	7.23041
212	01_red_delta_84_26		0	0	0	0.903784	0.916634	0.993251	0.995483	0.971555	0	1	1	0.973756	0.700636	0.773751	2015-09-16	2015-09-25 11:38:44	7.22885
226	01_red_delta_85_9		0	0	0	0.921246	0.957326	0.990012	0.98815	0.9587	0	1	1	0.990069	0.642382	0.780481	2015-09-16	2015-09-25 11:38:44	7.22837
168	01_red_delta_83_13		0	0	0	0.929902	0.951264	0.956635	0.987048	0.976414	0	1	1	0.989636	0.74841	0.688741	2015-09-16	2015-09-25 11:38:44	7.22805
270	01_red_delta_86_22		0	0	0	0.905487	0.898478	0.967299	0.991705	0.974497	0	1	1	0.998722	0.641022	0.849779	2015-09-16	2015-09-25 11:38:44	7.22699
533	01_red_delta_95_6		0	0	0	0.965945	0.877501	0.964814	0.946577	0.858739	0	1	1	0.986307	0.825242	0.80175	2015-09-16	2015-09-25 11:38:44	7.22688
259	01_red_delta_86_11		0	0	0	0.918148	0.947547	0.990487	0.992231	0.97778	0	1	1	0.982687	0.694216	0.723158	2015-09-16	2015-09-25 11:38:44	7.22625
234	01_red_delta_85_17		0	0	0	0.914028	0.908755	0.976514	0.996689	0.981779	0	1	1	0.995575	0.737507	0.712595	2015-09-16	2015-09-25 11:38:44	7.22344
110	01_red_delta_81_17		0	0	0	0.89937	0.950149	0.992146	0.988233	0.963597	0	1	1	0.992344	0.678443	0.759146	2015-09-16	2015-09-25 11:38:44	7.22343
174	01_red_delta_83_19		0	0	0	0.875934	0.946474	0.992708	0.992956	0.980175	0	1	1	1	0.668247	0.766711	2015-09-16	2015-09-25 11:38:44	7.22321
316	01_red_delta_88_6		0	0	0	0.937926	0.953596	0.981434	0.967676	0.990853	0	1	1	0.960901	0.634044	0.796644	2015-09-16	2015-09-25 11:38:44	7.22308
170	01_red_delta_83_15		0	0	0	0.89898	0.951667	0.993563	0.996366	0.98301	0	1	1	0.97597	0.637182	0.786225	2015-09-16	2015-09-25 11:38:44	7.22296
194	01_red_delta_84_8		0	0	0	0.951256	0.954588	0.9454	0.989873	0.942839	0	1	1	0.999914	0.722058	0.716696	2015-09-16	2015-09-25 11:38:44	7.22262
267	01_red_delta_86_19		0	0	0	0.915771	0.890497	0.973962	0.997123	0.963793	0	1	1	0.997186	0.634402	0.847575	2015-09-16	2015-09-25 11:38:44	7.22031
227	01_red_delta_85_10		0	0	0	0.920542	0.943764	0.993485	0.982901	0.970818	0	1	1	0.999966	0.574428	0.834379	2015-09-16	2015-09-25 11:38:44	7.22028
354	01_red_delta_89_13		0	0	0	0.937405	0.889082	0.985141	0.983274	0.947946	0	1	1	0.955643	0.685881	0.83551	2015-09-16	2015-09-25 11:38:44	7.21988
113	01_red_delta_81_20		0	0	0	0.89374	0.949664	0.98649	0.980491	0.977922	0	1	1	0.995895	0.728514	0.706129	2015-09-16	2015-09-25 11:38:44	7.21884
198	01_red_delta_84_12		0	0	0	0.91159	0.954014	0.982189	0.979376	0.964291	0	1	1	0.994909	0.601131	0.831106	2015-09-16	2015-09-25 11:38:44	7.21861
79	01_red_delta_80_17		0	0	0	0.896869	0.944112	0.991742	0.999489	0.977013	0	1	1	0.987715	0.626463	0.794883	2015-09-16	2015-09-25 11:38:44	7.21829
282	01_red_delta_87_3		0	0	0	0.971946	0.885508	0.954457	0.965031	0.975079	0	1	1	0.999865	0.846967	0.619329	2015-09-16	2015-09-25 11:38:44	7.21818
240	01_red_delta_85_23		0	0	0	0.893084	0.89924	0.9932	0.998488	0.973624	0	1	1	0.991955	0.668514	0.799637	2015-09-16	2015-09-25 11:38:44	7.21774
253	01_red_delta_86_5		0	0	0	0.951264	0.944173	0.977551	0.945531	0.926681	0	1	1	0.985528	0.741407	0.745419	2015-09-16	2015-09-25 11:38:44	7.21755
293	01_red_delta_87_14		0	0	0	0.904943	0.915283	0.978105	0.976473	0.981354	0	1	1	0.989512	0.614772	0.857049	2015-09-16	2015-09-25 11:38:44	7.21749
351	01_red_delta_89_10		0	0	0	0.942308	0.862342	0.972907	0.993247	0.946839	0	1	1	0.982247	0.669627	0.846734	2015-09-16	2015-09-25 11:38:44	7.21625
266	01_red_delta_86_18		0	0	0	0.896884	0.890189	0.991705	0.998278	0.9827	0	1	1	0.993295	0.690203	0.772168	2015-09-16	2015-09-25 11:38:44	7.21542
470	01_red_delta_93_5		0	0	0	0.970555	0.852032	0.98247	0.952426	0.939549	0	1	1	0.959946	0.76389	0.79422	2015-09-16	2015-09-25 11:38:44	7.21509
100	01_red_delta_81_7		0	0	0	0.943685	0.958967	0.976478	0.965966	0.94068	0	1	1	0.994288	0.745482	0.687885	2015-09-16	2015-09-25 11:38:44	7.21343
265	01_red_delta_86_17		0	0	0	0.886218	0.932665	0.992518	0.995459	0.961607	0	1	1	0.994704	0.617694	0.831495	2015-09-16	2015-09-25 11:38:44	7.21236
74	01_red_delta_80_12		0	0	0	0.917193	0.955156	0.992513	0.967416	0.968246	0	1	1	0.993138	0.659317	0.759149	2015-09-16	2015-09-25 11:38:44	7.21213
135	01_red_delta_82_11		0	0	0	0.920703	0.966156	0.941675	0.976572	0.973348	0	1	1	0.999995	0.747448	0.681145	2015-09-16	2015-09-25 11:38:44	7.20704
417	01_red_delta_91_14		0	0	0	0.946558	0.914052	0.938366	0.987669	0.916696	0	1	1	0.976504	0.618009	0.909043	2015-09-16	2015-09-25 11:38:44	7.2069
85	01_red_delta_80_23		0	0	0	0.87348	0.950763	0.994525	0.990951	0.958926	0	1	1	0.997302	0.704677	0.732208	2015-09-16	2015-09-25 11:38:44	7.20283
137	01_red_delta_82_13		0	0	0	0.916987	0.924602	0.992062	0.968053	0.974935	0	1	1	0.994401	0.679786	0.75098	2015-09-16	2015-09-25 11:38:44	7.20181
173	01_red_delta_83_18		0	0	0	0.895873	0.938154	0.972524	0.992428	0.976895	0	1	1	0.99005	0.625669	0.810132	2015-09-16	2015-09-25 11:38:44	7.20173
208	01_red_delta_84_22		0	0	0	0.873787	0.934971	0.993403	0.993408	0.979661	0	1	1	0.998103	0.654161	0.773963	2015-09-16	2015-09-25 11:38:44	7.20146
356	01_red_delta_89_15		0	0	0	0.927901	0.842804	0.978523	0.971193	0.933738	0	1	1	0.987754	0.702331	0.85702	2015-09-16	2015-09-25 11:38:44	7.20126
116	01_red_delta_81_23		0	0	0	0.888271	0.917965	0.994358	0.993085	0.953061	0	1	1	0.986118	0.710477	0.757818	2015-09-16	2015-09-25 11:38:44	7.20115
378	01_red_delta_90_6		0	0	0	0.947733	0.939561	0.963441	0.971546	0.97629	0	1	1	0.983032	0.511834	0.90644	2015-09-16	2015-09-25 11:38:44	7.19988
73	01_red_delta_80_11		0	0	0	0.923878	0.952317	0.962101	0.957091	0.97826	0	1	1	0.999997	0.734078	0.691235	2015-09-16	2015-09-25 11:38:44	7.19896
75	01_red_delta_80_13		0	0	0	0.919802	0.958044	0.962492	0.959004	0.96748	0	1	1	0.990678	0.76317	0.676233	2015-09-16	2015-09-25 11:38:44	7.1969
111	01_red_delta_81_18		0	0	0	0.878586	0.945222	0.990557	0.995993	0.972177	0	1	1	0.999428	0.64657	0.768221	2015-09-16	2015-09-25 11:38:44	7.19675
230	01_red_delta_85_13		0	0	0	0.896501	0.919091	0.988543	0.988918	0.979543	0	1	1	0.999131	0.650301	0.773875	2015-09-16	2015-09-25 11:38:44	7.1959
115	01_red_delta_81_22		0	0	0	0.888439	0.919719	0.991429	0.989608	0.96508	0	1	1	0.999448	0.661683	0.780494	2015-09-16	2015-09-25 11:38:44	7.1959
106	01_red_delta_81_13		0	0	0	0.900743	0.955305	0.991645	0.969098	0.963503	0	1	1	0.999229	0.642836	0.773436	2015-09-16	2015-09-25 11:38:44	7.1958
130	01_red_delta_82_6		0	0	0	0.949297	0.962131	0.979985	0.923942	0.937282	0	1	1	0.994689	0.702328	0.745487	2015-09-16	2015-09-25 11:38:44	7.19514
287	01_red_delta_87_8		0	0	0	0.94004	0.924541	0.997565	0.958866	0.987238	0	1	1	0.965719	0.595504	0.825462	2015-09-16	2015-09-25 11:38:44	7.19493
148	01_red_delta_82_24		0	0	0	0.860989	0.952703	0.990829	0.996508	0.967235	0	1	1	0.999274	0.670694	0.75642	2015-09-16	2015-09-25 11:38:44	7.19465
166	01_red_delta_83_11		0	0	0	0.91723	0.967528	0.943425	0.98204	0.96448	0	1	1	0.998881	0.747071	0.67395	2015-09-16	2015-09-25 11:38:44	7.1946
147	01_red_delta_82_23		0	0	0	0.863655	0.959531	0.993935	0.990968	0.974114	0	1	1	0.98241	0.643122	0.785961	2015-09-16	2015-09-25 11:38:44	7.1937
410	01_red_delta_91_7		0	0	0	0.951279	0.897233	0.993698	0.9815	0.94452	0	1	1	0.943692	0.627824	0.853788	2015-09-16	2015-09-25 11:38:44	7.19353
179	01_red_delta_83_24		0	0	0	0.859705	0.948747	0.990354	0.994015	0.969009	0	1	1	0.997498	0.64944	0.784088	2015-09-16	2015-09-25 11:38:44	7.19285
119	01_red_delta_81_26		0	0	0	0.866379	0.942942	0.990268	0.997857	0.97198	0	1	1	0.995527	0.701753	0.725974	2015-09-16	2015-09-25 11:38:44	7.19268
193	01_red_delta_84_7		0	0	0	0.957613	0.95535	0.947625	0.946972	0.91663	0	1	1	0.992164	0.815091	0.661102	2015-09-16	2015-09-25 11:38:44	7.19255
233	01_red_delta_85_16		0	0	0	0.894686	0.938936	0.968756	0.990249	0.970297	0	1	1	0.994216	0.596968	0.838023	2015-09-16	2015-09-25 11:38:44	7.19213
210	01_red_delta_84_24		0	0	0	0.892388	0.939559	0.989222	0.993187	0.946416	0	1	1	0.981788	0.668019	0.781497	2015-09-16	2015-09-25 11:38:44	7.19208
379	01_red_delta_90_7		0	0	0	0.953903	0.875423	0.973699	0.964922	0.990132	0	1	1	0.978414	0.648831	0.805617	2015-09-16	2015-09-25 11:38:44	7.19094
324	01_red_delta_88_14		0	0	0	0.929617	0.881817	0.991103	0.979847	0.956322	0	1	1	0.940067	0.674564	0.836982	2015-09-16	2015-09-25 11:38:44	7.19032
289	01_red_delta_87_10		0	0	0	0.939328	0.909547	0.987146	0.977385	0.972573	0	1	1	0.919503	0.666913	0.817741	2015-09-16	2015-09-25 11:38:44	7.19013
197	01_red_delta_84_11		0	0	0	0.916412	0.936585	0.9854	0.93908	0.98631	0	1	1	0.992306	0.619977	0.813463	2015-09-16	2015-09-25 11:38:44	7.18953
349	01_red_delta_89_8		0	0	0	0.939118	0.898643	0.988575	0.975406	0.984426	0	1	1	0.931727	0.659395	0.812024	2015-09-16	2015-09-25 11:38:44	7.18932
149	01_red_delta_82_25		0	0	0	0.882795	0.941405	0.990428	0.971541	0.968767	0	1	1	0.990439	0.723137	0.720532	2015-09-16	2015-09-25 11:38:44	7.18905
192	01_red_delta_84_6		0	0	0	0.937414	0.94427	0.952342	0.96314	0.95381	0	1	1	0.990825	0.778929	0.667633	2015-09-16	2015-09-25 11:38:44	7.18836
133	01_red_delta_82_9		0	0	0	0.938539	0.959068	0.933268	0.957288	0.980594	0	1	1	0.99893	0.768999	0.651498	2015-09-16	2015-09-25 11:38:44	7.18818
283	01_red_delta_87_4		0	0	0	0.964356	0.90605	0.941099	0.974018	0.95984	0	1	1	0.991955	0.824202	0.625793	2015-09-16	2015-09-25 11:38:44	7.18731
164	01_red_delta_83_9		0	0	0	0.944556	0.935401	0.942955	0.951803	0.960133	0	1	1	0.991603	0.797049	0.661806	2015-09-16	2015-09-25 11:38:44	7.18531
105	01_red_delta_81_12		0	0	0	0.922455	0.959575	0.967556	0.972263	0.959329	0	1	1	0.99829	0.721458	0.681888	2015-09-16	2015-09-25 11:38:44	7.18281
138	01_red_delta_82_14		0	0	0	0.901977	0.938491	0.98368	0.98629	0.959789	0	1	1	0.987715	0.67583	0.748259	2015-09-16	2015-09-25 11:38:44	7.18203
109	01_red_delta_81_16		0	0	0	0.885443	0.940897	0.993557	0.993088	0.981721	0	1	1	0.976308	0.619949	0.791019	2015-09-16	2015-09-25 11:38:44	7.18198
313	01_red_delta_88_3		0	0	0	0.963527	0.948857	0.969547	0.922166	0.914144	0	1	1	0.992917	0.743433	0.726612	2015-09-16	2015-09-25 11:38:44	7.1812
382	01_red_delta_90_10		0	0	0	0.945861	0.840918	0.978001	0.992682	0.961859	0	1	1	0.988892	0.61496	0.857685	2015-09-16	2015-09-25 11:38:44	7.18086
162	01_red_delta_83_7		0	0	0	0.953114	0.953075	0.943019	0.935772	0.950264	0	1	1	0.999951	0.787842	0.657209	2015-09-16	2015-09-25 11:38:44	7.18024
255	01_red_delta_86_7		0	0	0	0.947377	0.941147	0.947901	0.931954	0.952638	0	1	1	0.960419	0.799585	0.696735	2015-09-16	2015-09-25 11:38:44	7.17775
167	01_red_delta_83_12		0	0	0	0.90211	0.929797	0.994214	0.981632	0.968757	0	1	1	0.998552	0.629175	0.772354	2015-09-16	2015-09-25 11:38:44	7.17659
272	01_red_delta_86_24		0	0	0	0.887998	0.921126	0.972981	0.997991	0.964313	0	1	1	0.985715	0.601893	0.843313	2015-09-16	2015-09-25 11:38:44	7.17533
239	01_red_delta_85_22		0	0	0	0.902793	0.877301	0.973178	0.996742	0.974308	0	1	1	0.987766	0.660353	0.802054	2015-09-16	2015-09-25 11:38:44	7.17449
364	01_red_delta_89_23		0	0	0	0.932184	0.900755	0.960534	0.971864	0.950405	0	1	1	0.974684	0.620467	0.863498	2015-09-16	2015-09-25 11:38:44	7.17439
131	01_red_delta_82_7		0	0	0	0.939163	0.96546	0.949997	0.946823	0.943428	0	1	1	0.984267	0.767332	0.6772	2015-09-16	2015-09-25 11:38:44	7.17367
71	01_red_delta_80_9		0	0	0	0.914053	0.956719	0.988883	0.956853	0.963841	0	1	1	0.99983	0.653139	0.738074	2015-09-16	2015-09-25 11:38:44	7.17139
346	01_red_delta_89_5		0	0	0	0.952477	0.904434	0.993187	0.964795	0.977987	0	1	1	0.971598	0.556441	0.850032	2015-09-16	2015-09-25 11:38:44	7.17095
117	01_red_delta_81_24		0	0	0	0.89362	0.923288	0.984637	0.987407	0.967983	0	1	1	0.963792	0.72693	0.723075	2015-09-16	2015-09-25 11:38:44	7.17073
140	01_red_delta_82_16		0	0	0	0.866659	0.941673	0.981681	0.996467	0.969169	0	1	1	0.979481	0.695123	0.739414	2015-09-16	2015-09-25 11:38:44	7.16967
84	01_red_delta_80_22		0	0	0	0.884093	0.961297	0.984888	0.98446	0.960589	0	1	1	0.993046	0.660303	0.740897	2015-09-16	2015-09-25 11:38:44	7.16957
236	01_red_delta_85_19		0	0	0	0.885551	0.906361	0.982873	0.990842	0.978112	0	1	1	0.992764	0.586388	0.844643	2015-09-16	2015-09-25 11:38:44	7.16753
448	01_red_delta_92_14		0	0	0	0.945388	0.853202	0.954131	0.949708	0.948748	0	1	1	0.926495	0.716421	0.873053	2015-09-16	2015-09-25 11:38:44	7.16714
132	01_red_delta_82_8		0	0	0	0.921117	0.952936	0.975236	0.967933	0.962686	0	1	1	0.999989	0.677092	0.708591	2015-09-16	2015-09-25 11:38:44	7.16558
101	01_red_delta_81_8		0	0	0	0.910621	0.954592	0.982965	0.979096	0.960199	0	1	1	0.992262	0.689788	0.695627	2015-09-16	2015-09-25 11:38:44	7.16515
377	01_red_delta_90_5		0	0	0	0.965319	0.868475	0.893171	0.976078	0.96274	0	1	1	0.994067	0.744082	0.760714	2015-09-16	2015-09-25 11:38:44	7.16465
436	01_red_delta_92_2		0	0	0	0.967135	0.916677	0.982901	0.959991	0.869143	0	1	1	0.963022	0.726958	0.776235	2015-09-16	2015-09-25 11:38:44	7.16206
302	01_red_delta_87_23		0	0	0	0.907447	0.878306	0.970113	0.986228	0.969564	0	1	1	0.955725	0.675549	0.819107	2015-09-16	2015-09-25 11:38:44	7.16204
566	01_red_delta_96_8		0	0	0	0.961002	0.880231	0.989919	0.889505	0.936192	0	1	1	0.918732	0.700456	0.884101	2015-09-16	2015-09-25 11:38:44	7.16014
134	01_red_delta_82_10		0	0	0	0.929562	0.926379	0.966592	0.972938	0.964028	0	1	1	0.998021	0.710621	0.69135	2015-09-16	2015-09-25 11:38:44	7.15949
269	01_red_delta_86_21		0	0	0	0.906886	0.916632	0.974756	0.992182	0.941209	0	1	1	0.999838	0.582007	0.84436	2015-09-16	2015-09-25 11:38:44	7.15787
78	01_red_delta_80_16		0	0	0	0.866691	0.961408	0.982414	0.973287	0.967827	0	1	1	0.998958	0.633426	0.772168	2015-09-16	2015-09-25 11:38:44	7.15618
469	01_red_delta_93_4		0	0	0	0.961241	0.917033	0.949033	0.919283	0.915205	0	1	1	0.978663	0.596248	0.918063	2015-09-16	2015-09-25 11:38:44	7.15477
350	01_red_delta_89_9		0	0	0	0.935334	0.873328	0.985044	0.99232	0.972966	0	1	1	0.965847	0.575343	0.853879	2015-09-16	2015-09-25 11:38:44	7.15406
391	01_red_delta_90_19		0	0	0	0.923134	0.841545	0.971105	0.97591	0.927687	0	1	1	0.968634	0.67457	0.86951	2015-09-16	2015-09-25 11:38:44	7.1521
86	01_red_delta_80_24		0	0	0	0.87684	0.910987	0.99433	0.989766	0.973932	0	1	1	0.977102	0.695185	0.733679	2015-09-16	2015-09-25 11:38:44	7.15182
209	01_red_delta_84_23		0	0	0	0.893633	0.941481	0.977207	0.998456	0.948059	0	1	1	0.963567	0.675641	0.753121	2015-09-16	2015-09-25 11:38:44	7.15116
281	01_red_delta_87_2		0	0	0	0.953895	0.953857	0.950746	0.965332	0.989035	0	1	1	0.978747	0.72468	0.631399	2015-09-16	2015-09-25 11:38:44	7.14769
298	01_red_delta_87_19		0	0	0	0.906871	0.877226	0.982601	0.985467	0.951583	0	1	1	0.982902	0.614758	0.845171	2015-09-16	2015-09-25 11:38:44	7.14658
355	01_red_delta_89_14		0	0	0	0.920683	0.868695	0.991432	0.976527	0.969124	0	1	1	0.938694	0.663068	0.818055	2015-09-16	2015-09-25 11:38:44	7.14628
102	01_red_delta_81_9		0	0	0	0.920199	0.967485	0.969954	0.940589	0.930908	0	1	1	0.999997	0.6796	0.735442	2015-09-16	2015-09-25 11:38:44	7.14417
294	01_red_delta_87_15		0	0	0	0.91909	0.895398	0.982955	0.996279	0.944196	0	1	1	0.922722	0.674892	0.808417	2015-09-16	2015-09-25 11:38:44	7.14395
446	01_red_delta_92_12		0	0	0	0.937019	0.848311	0.946388	0.961348	0.936466	0	1	1	0.965984	0.651988	0.895749	2015-09-16	2015-09-25 11:38:44	7.14325
206	01_red_delta_84_20		0	0	0	0.855424	0.946964	0.990272	0.996681	0.975631	0	1	1	0.975025	0.581487	0.820306	2015-09-16	2015-09-25 11:38:44	7.14179
141	01_red_delta_82_17		0	0	0	0.87261	0.92414	0.991373	0.977696	0.971185	0	1	1	0.992887	0.6315	0.780335	2015-09-16	2015-09-25 11:38:44	7.14173
244	01_red_delta_85_27		0	0	0	0.881548	0.894415	0.983324	0.984002	0.972963	0	1	1	0.957559	0.677911	0.785116	2015-09-16	2015-09-25 11:38:44	7.13684
304	01_red_delta_87_25		0	0	0	0.893768	0.855304	0.967454	0.985772	0.962225	0	1	1	0.974495	0.653696	0.841198	2015-09-16	2015-09-25 11:38:44	7.13391
300	01_red_delta_87_21		0	0	0	0.910282	0.916697	0.965457	0.96824	0.953337	0	1	1	0.962212	0.615748	0.841613	2015-09-16	2015-09-25 11:38:44	7.13359
163	01_red_delta_83_8		0	0	0	0.930226	0.947472	0.953662	0.908528	0.986653	0	1	1	0.999376	0.734463	0.670109	2015-09-16	2015-09-25 11:38:44	7.13049
242	01_red_delta_85_25		0	0	0	0.860711	0.930156	0.977625	0.993703	0.974958	0	1	1	0.953484	0.619887	0.81502	2015-09-16	2015-09-25 11:38:44	7.12554
180	01_red_delta_83_25		0	0	0	0.891438	0.876108	0.974852	0.997869	0.960265	0	1	1	0.988606	0.67362	0.761857	2015-09-16	2015-09-25 11:38:44	7.12462
468	01_red_delta_93_3		0	0	0	0.970703	0.915717	0.942086	0.907446	0.905891	0	1	1	0.98083	0.755245	0.746597	2015-09-16	2015-09-25 11:38:44	7.12452
87	01_red_delta_80_25		0	0	0	0.847218	0.931671	0.987912	0.982464	0.970078	0	1	1	0.999983	0.613321	0.791173	2015-09-16	2015-09-25 11:38:44	7.12382
81	01_red_delta_80_19		0	0	0	0.856071	0.945685	0.994979	0.987375	0.976435	0	1	1	0.970341	0.657194	0.735523	2015-09-16	2015-09-25 11:38:44	7.1236
83	01_red_delta_80_21		0	0	0	0.859092	0.94286	0.994973	0.963156	0.975387	0	1	1	0.984003	0.639965	0.762628	2015-09-16	2015-09-25 11:38:44	7.12206
223	01_red_delta_85_6		0	0	0	0.936062	0.942942	0.976648	0.934616	0.969007	0	1	1	0.996175	0.665694	0.697421	2015-09-16	2015-09-25 11:38:44	7.11856
508	01_red_delta_94_12		0	0	0	0.942177	0.858226	0.969656	0.942874	0.975553	0	1	1	0.927914	0.630431	0.87146	2015-09-16	2015-09-25 11:38:44	7.11829
72	01_red_delta_80_10		0	0	0	0.929979	0.942696	0.926508	0.965974	0.942689	0	1	1	0.999868	0.768806	0.64061	2015-09-16	2015-09-25 11:38:44	7.11713
98	01_red_delta_81_5		0	0	0	0.944501	0.957701	0.94843	0.914481	0.956095	0	1	1	0.972512	0.761792	0.661212	2015-09-16	2015-09-25 11:38:44	7.11673
404	01_red_delta_91_1		0	0	0	0.972485	0.937605	0.918635	0.90232	0.971015	0	1	1	0.970091	0.791834	0.652645	2015-09-16	2015-09-25 11:38:44	7.11663
297	01_red_delta_87_18		0	0	0	0.907266	0.895983	0.93354	0.994857	0.952635	0	1	1	0.962606	0.584982	0.884218	2015-09-16	2015-09-25 11:38:44	7.11609
567	01_red_delta_96_9		0	0	0	0.961005	0.902613	0.948836	0.93538	0.854977	0	1	1	0.929001	0.663377	0.920878	2015-09-16	2015-09-25 11:38:44	7.11607
181	01_red_delta_83_26		0	0	0	0.854757	0.921698	0.992035	0.989043	0.961789	0	1	1	0.99743	0.629093	0.769614	2015-09-16	2015-09-25 11:38:44	7.11546
271	01_red_delta_86_23		0	0	0	0.884952	0.892923	0.964511	0.9865	0.971598	0	1	1	0.974442	0.596221	0.841928	2015-09-16	2015-09-25 11:38:44	7.11308
296	01_red_delta_87_17		0	0	0	0.900246	0.91313	0.963176	0.991892	0.962756	0	1	1	0.939688	0.614126	0.825891	2015-09-16	2015-09-25 11:38:44	7.1109
252	01_red_delta_86_4		0	0	0	0.952944	0.952141	0.911192	0.942747	0.976619	0	1	1	0.956705	0.728373	0.689627	2015-09-16	2015-09-25 11:38:44	7.11035
237	01_red_delta_85_20		0	0	0	0.873275	0.930438	0.985275	0.993849	0.97921	0	1	1	0.911514	0.624956	0.810827	2015-09-16	2015-09-25 11:38:44	7.10934
353	01_red_delta_89_12		0	0	0	0.913738	0.869105	0.980857	0.978315	0.973284	0	1	1	0.964511	0.557163	0.872162	2015-09-16	2015-09-25 11:38:44	7.10914
392	01_red_delta_90_20		0	0	0	0.909101	0.879218	0.912652	0.970241	0.954928	0	1	1	0.992138	0.573577	0.91721	2015-09-16	2015-09-25 11:38:44	7.10906
161	01_red_delta_83_6		0	0	0	0.944808	0.939625	0.970745	0.906319	0.907285	0	1	1	0.996273	0.730841	0.709267	2015-09-16	2015-09-25 11:38:44	7.10516
295	01_red_delta_87_16		0	0	0	0.900722	0.930895	0.955023	0.992112	0.969406	0	1	1	0.919473	0.563314	0.873292	2015-09-16	2015-09-25 11:38:44	7.10424
159	01_red_delta_83_4		0	0	0	0.943951	0.955679	0.947419	0.920191	0.958081	0	1	1	0.998396	0.736696	0.643662	2015-09-16	2015-09-25 11:38:44	7.10407
471	01_red_delta_93_6		0	0	0	0.97012	0.77453	0.951824	0.956631	0.917379	0	1	1	0.960503	0.696728	0.875005	2015-09-16	2015-09-25 11:38:44	7.10272
357	01_red_delta_89_16		0	0	0	0.917834	0.832696	0.980657	0.989458	0.971917	0	1	1	0.963286	0.591573	0.854937	2015-09-16	2015-09-25 11:38:44	7.10236
150	01_red_delta_82_26		0	0	0	0.823599	0.939548	0.993415	0.991227	0.976288	0	1	1	0.999302	0.609197	0.769038	2015-09-16	2015-09-25 11:38:44	7.10161
274	01_red_delta_86_26		0	0	0	0.861169	0.882326	0.975259	0.994276	0.972024	0	1	1	0.966306	0.596229	0.847502	2015-09-16	2015-09-25 11:38:44	7.09509
76	01_red_delta_80_14		0	0	0	0.896448	0.945007	0.973218	0.97011	0.95987	0	1	1	0.976846	0.708413	0.664727	2015-09-16	2015-09-25 11:38:44	7.09464
332	01_red_delta_88_22		0	0	0	0.893478	0.912384	0.933342	0.983477	0.945593	0	1	1	0.962051	0.574326	0.889731	2015-09-16	2015-09-25 11:38:44	7.09438
243	01_red_delta_85_26		0	0	0	0.874118	0.861887	0.980473	0.98783	0.969617	0	1	1	0.971655	0.643764	0.802513	2015-09-16	2015-09-25 11:38:44	7.09186
374	01_red_delta_90_2		0	0	0	0.972272	0.93163	0.929554	0.898079	0.915807	0	1	1	0.999925	0.780556	0.663666	2015-09-16	2015-09-25 11:38:44	7.09149
509	01_red_delta_94_13		0	0	0	0.954563	0.774233	0.929276	0.967964	0.874004	0	1	1	0.949002	0.707198	0.930915	2015-09-16	2015-09-25 11:38:44	7.08716
317	01_red_delta_88_7		0	0	0	0.941014	0.882977	0.98961	0.934013	0.945683	0	1	1	0.938903	0.669082	0.783164	2015-09-16	2015-09-25 11:38:44	7.08444
306	01_red_delta_87_27		0	0	0	0.899485	0.891696	0.963849	0.986396	0.949008	0	1	1	0.933518	0.612683	0.845751	2015-09-16	2015-09-25 11:38:44	7.08239
97	01_red_delta_81_4		0	0	0	0.946227	0.96138	0.932075	0.889736	0.923809	0	1	1	0.999169	0.804714	0.623955	2015-09-16	2015-09-25 11:38:44	7.08106
421	01_red_delta_91_18		0	0	0	0.925388	0.840936	0.959881	0.965724	0.911423	0	1	1	0.969788	0.609871	0.896409	2015-09-16	2015-09-25 11:38:44	7.07942
388	01_red_delta_90_16		0	0	0	0.919329	0.884482	0.929309	0.982229	0.972958	0	1	1	0.954556	0.513065	0.92297	2015-09-16	2015-09-25 11:38:44	7.0789
406	01_red_delta_91_3		0	0	0	0.969027	0.854594	0.976018	0.904417	0.868692	0	1	1	0.994037	0.789366	0.72188	2015-09-16	2015-09-25 11:38:44	7.07803
373	01_red_delta_90_1		0	0	0	0.970911	0.923538	0.930388	0.874374	0.971625	0	1	1	0.999623	0.74994	0.657599	2015-09-16	2015-09-25 11:38:44	7.078
70	01_red_delta_80_8		0	0	0	0.921598	0.968191	0.961085	0.926395	0.93782	0	1	1	0.999897	0.714614	0.648038	2015-09-16	2015-09-25 11:38:44	7.07764
250	01_red_delta_86_2		0	0	0	0.962194	0.941412	0.960121	0.817588	0.938717	0	1	1	0.999974	0.796285	0.660937	2015-09-16	2015-09-25 11:38:44	7.07723
280	01_red_delta_87_1		0	0	0	0.961994	0.927475	0.950602	0.946451	0.951604	0	1	1	0.992787	0.6833	0.661945	2015-09-16	2015-09-25 11:38:44	7.07616
387	01_red_delta_90_15		0	0	0	0.924265	0.831819	0.970266	0.979249	0.92841	0	1	1	0.950276	0.613974	0.876974	2015-09-16	2015-09-25 11:38:44	7.07523
416	01_red_delta_91_13		0	0	0	0.928408	0.82801	0.98014	0.973869	0.937349	0	1	1	0.896689	0.665902	0.862913	2015-09-16	2015-09-25 11:38:44	7.07328
301	01_red_delta_87_22		0	0	0	0.887761	0.900895	0.952252	0.993597	0.946586	0	1	1	0.948417	0.577201	0.866009	2015-09-16	2015-09-25 11:38:44	7.07272
534	01_red_delta_95_7		0	0	0	0.963664	0.819713	0.96647	0.957225	0.917316	0	1	1	0.943528	0.572158	0.931437	2015-09-16	2015-09-25 11:38:44	7.07151
333	01_red_delta_88_23		0	0	0	0.899568	0.845278	0.953252	0.992461	0.956642	0	1	1	0.952401	0.598897	0.871871	2015-09-16	2015-09-25 11:38:44	7.07037
358	01_red_delta_89_17		0	0	0	0.923892	0.831014	0.938088	0.96572	0.960978	0	1	1	0.965051	0.617435	0.867709	2015-09-16	2015-09-25 11:38:44	7.06989
118	01_red_delta_81_25		0	0	0	0.849625	0.899974	0.958635	0.986232	0.975115	0	1	1	0.999968	0.569483	0.827841	2015-09-16	2015-09-25 11:38:44	7.06687
222	01_red_delta_85_5		0	0	0	0.94781	0.945655	0.908147	0.945411	0.943527	0	1	1	0.999487	0.707724	0.6683	2015-09-16	2015-09-25 11:38:44	7.06606
69	01_red_delta_80_7		0	0	0	0.92492	0.962823	0.952508	0.957696	0.888947	0	1	1	0.980302	0.686399	0.711305	2015-09-16	2015-09-25 11:38:44	7.0649
362	01_red_delta_89_21		0	0	0	0.905821	0.812259	0.953753	0.976599	0.955929	0	1	1	0.981986	0.590031	0.887513	2015-09-16	2015-09-25 11:38:44	7.06389
66	01_red_delta_80_4		0	0	0	0.950486	0.955401	0.909061	0.903911	0.960711	0	1	1	0.992306	0.808025	0.579859	2015-09-16	2015-09-25 11:38:44	7.05976
305	01_red_delta_87_26		0	0	0	0.868098	0.9057	0.940867	0.993776	0.963863	0	1	1	0.97337	0.563041	0.848627	2015-09-16	2015-09-25 11:38:44	7.05734
318	01_red_delta_88_8		0	0	0	0.934036	0.884306	0.992246	0.990758	0.940011	0	1	1	0.913003	0.585124	0.816978	2015-09-16	2015-09-25 11:38:44	7.05646
408	01_red_delta_91_5		0	0	0	0.960783	0.777445	0.999966	0.949944	0.960261	0	1	1	0.958711	0.619508	0.828916	2015-09-16	2015-09-25 11:38:44	7.05553
457	01_red_delta_92_23		0	0	0	0.946388	0.821335	0.945056	0.922341	0.879454	0	1	1	0.977185	0.678809	0.883438	2015-09-16	2015-09-25 11:38:44	7.05401
466	01_red_delta_93_1		0	0	0	0.977807	0.886598	0.949441	0.911983	0.865943	0	1	1	0.965883	0.765671	0.730196	2015-09-16	2015-09-25 11:38:44	7.05352
422	01_red_delta_91_19		0	0	0	0.934425	0.806079	0.937616	0.984469	0.931308	0	1	1	0.970938	0.591969	0.896219	2015-09-16	2015-09-25 11:38:44	7.05302
512	01_red_delta_94_16		0	0	0	0.951359	0.77342	0.947513	0.945291	0.914974	0	1	1	0.923167	0.695303	0.901364	2015-09-16	2015-09-25 11:38:44	7.05239
160	01_red_delta_83_5		0	0	0	0.945966	0.954088	0.908276	0.918796	0.961959	0	1	1	0.998505	0.724495	0.638454	2015-09-16	2015-09-25 11:38:44	7.05054
516	01_red_delta_94_20		0	0	0	0.934003	0.80284	0.9514	0.948237	0.897263	0	1	1	0.936588	0.675169	0.903694	2015-09-16	2015-09-25 11:38:44	7.04919
445	01_red_delta_92_11		0	0	0	0.942971	0.839678	0.947242	0.933435	0.939482	0	1	1	0.986461	0.545466	0.912098	2015-09-16	2015-09-25 11:38:44	7.04683
500	01_red_delta_94_4		0	0	0	0.969458	0.819895	0.941233	0.949832	0.89928	0	1	1	0.99213	0.682383	0.791478	2015-09-16	2015-09-25 11:38:44	7.04569
385	01_red_delta_90_13		0	0	0	0.919649	0.899131	0.915513	0.976791	0.970235	0	1	1	0.955669	0.466956	0.941606	2015-09-16	2015-09-25 11:38:44	7.04555
67	01_red_delta_80_5		0	0	0	0.928918	0.964192	0.919972	0.944836	0.917321	0	1	1	0.986758	0.741268	0.641439	2015-09-16	2015-09-25 11:38:44	7.0447
478	01_red_delta_93_13		0	0	0	0.94636	0.815967	0.947143	0.948252	0.894989	0	1	1	0.986498	0.597222	0.907762	2015-09-16	2015-09-25 11:38:44	7.04419
95	01_red_delta_81_2		0	0	0	0.941014	0.963755	0.979505	0.881995	0.858671	0	1	1	0.999288	0.736051	0.683727	2015-09-16	2015-09-25 11:38:44	7.04401
360	01_red_delta_89_19		0	0	0	0.892529	0.849788	0.97878	0.979918	0.950116	0	1	1	0.9754	0.551151	0.865942	2015-09-16	2015-09-25 11:38:44	7.04363
307	01_red_delta_87_28		0	0	0	0.887948	0.881432	0.918028	0.971724	0.961594	0	1	1	0.99503	0.575831	0.851639	2015-09-16	2015-09-25 11:38:44	7.04323
361	01_red_delta_89_20		0	0	0	0.905126	0.900614	0.968948	0.962732	0.955711	0	1	1	0.865964	0.604021	0.88	2015-09-16	2015-09-25 11:38:44	7.04312
477	01_red_delta_93_12		0	0	0	0.949716	0.757802	0.967483	0.941524	0.888303	0	1	1	0.954186	0.689594	0.894182	2015-09-16	2015-09-25 11:38:44	7.04279
418	01_red_delta_91_15		0	0	0	0.938287	0.865392	0.954743	0.988292	0.862895	0	1	1	0.965549	0.566143	0.900331	2015-09-16	2015-09-25 11:38:44	7.04163
303	01_red_delta_87_24		0	0	0	0.85851	0.88948	0.950255	0.986068	0.96347	0	1	1	0.978394	0.560361	0.854496	2015-09-16	2015-09-25 11:38:44	7.04103
337	01_red_delta_88_27		0	0	0	0.890051	0.881459	0.96268	0.974015	0.933449	0	1	1	0.93144	0.617947	0.849282	2015-09-16	2015-09-25 11:38:44	7.04032
413	01_red_delta_91_10		0	0	0	0.947038	0.837326	0.984429	0.968203	0.910598	0	1	1	0.935416	0.602718	0.853966	2015-09-16	2015-09-25 11:38:44	7.03969
479	01_red_delta_93_14		0	0	0	0.94901	0.855984	0.966759	0.933145	0.798668	0	1	1	0.958337	0.683195	0.894004	2015-09-16	2015-09-25 11:38:44	7.0391
375	01_red_delta_90_3		0	0	0	0.962351	0.865658	0.937318	0.883956	0.969222	0	1	1	0.965176	0.669265	0.78553	2015-09-16	2015-09-25 11:38:44	7.03847
299	01_red_delta_87_20		0	0	0	0.866156	0.890205	0.964536	0.97214	0.957862	0	1	1	0.978915	0.536625	0.868894	2015-09-16	2015-09-25 11:38:44	7.03533
459	01_red_delta_92_25		0	0	0	0.932689	0.81753	0.941654	0.978393	0.907163	0	1	1	0.961373	0.62422	0.869766	2015-09-16	2015-09-25 11:38:44	7.03279
330	01_red_delta_88_20		0	0	0	0.886849	0.865582	0.974192	0.985732	0.96252	0	1	1	0.95055	0.572621	0.8347	2015-09-16	2015-09-25 11:38:44	7.03275
220	01_red_delta_85_3		0	0	0	0.949919	0.936777	0.95465	0.919455	0.921138	0	1	1	0.98593	0.662855	0.700704	2015-09-16	2015-09-25 11:38:44	7.03143
276	01_red_delta_86_28		0	0	0	0.879384	0.867959	0.989783	0.984958	0.953445	0	1	1	0.90335	0.682866	0.766617	2015-09-16	2015-09-25 11:38:44	7.02836
409	01_red_delta_91_6		0	0	0	0.9549	0.788657	0.997579	0.943017	0.959945	0	1	1	0.936944	0.626841	0.820438	2015-09-16	2015-09-25 11:38:44	7.02832
273	01_red_delta_86_25		0	0	0	0.852541	0.902498	0.957321	0.998864	0.975172	0	1	1	0.937913	0.574519	0.828262	2015-09-16	2015-09-25 11:38:44	7.02709
279	01_red_delta_87_0		0	0	0	0.958172	0.941906	0.978297	0.933645	0.919846	0	1	1	0.998892	0.674765	0.618975	2015-09-16	2015-09-25 11:38:44	7.0245
386	01_red_delta_90_14		0	0	0	0.923495	0.871793	0.92681	0.979722	0.92638	0	1	1	0.924227	0.559635	0.911908	2015-09-16	2015-09-25 11:38:44	7.02397
502	01_red_delta_94_6		0	0	0	0.963386	0.888551	0.93715	0.92324	0.896079	0	1	1	0.976552	0.535443	0.90349	2015-09-16	2015-09-25 11:38:44	7.02389
480	01_red_delta_93_15		0	0	0	0.936621	0.816429	0.966928	0.96703	0.917941	0	1	1	0.922129	0.596481	0.897027	2015-09-16	2015-09-25 11:38:44	7.02059
127	01_red_delta_82_3		0	0	0	0.955265	0.95588	0.924709	0.910458	0.886536	0	1	1	0.999467	0.813743	0.574138	2015-09-16	2015-09-25 11:38:44	7.0202
190	01_red_delta_84_4		0	0	0	0.940369	0.945935	0.918849	0.918084	0.948111	0	1	1	0.995332	0.70322	0.64772	2015-09-16	2015-09-25 11:38:44	7.01762
249	01_red_delta_86_1		0	0	0	0.967478	0.956241	0.923048	0.900169	0.876086	0	1	1	0.992453	0.795042	0.60701	2015-09-16	2015-09-25 11:38:44	7.01753
187	01_red_delta_84_1		0	0	0	0.961569	0.957326	0.900877	0.880698	0.941522	0	1	1	0.999502	0.820204	0.555393	2015-09-16	2015-09-25 11:38:44	7.01709
191	01_red_delta_84_5		0	0	0	0.941117	0.939407	0.949856	0.921852	0.928894	0	1	1	0.993676	0.699658	0.642454	2015-09-16	2015-09-25 11:38:44	7.01691
532	01_red_delta_95_5		0	0	0	0.961699	0.930623	0.898609	0.940492	0.886664	0	1	1	0.9713	0.514521	0.913005	2015-09-16	2015-09-25 11:38:44	7.01691
505	01_red_delta_94_9		0	0	0	0.950926	0.770874	0.962677	0.97078	0.90177	0	1	1	0.95413	0.619362	0.885964	2015-09-16	2015-09-25 11:38:44	7.01648
336	01_red_delta_88_26		0	0	0	0.907967	0.836591	0.9484	0.968558	0.946172	0	1	1	0.94337	0.637497	0.82529	2015-09-16	2015-09-25 11:38:44	7.01384
251	01_red_delta_86_3		0	0	0	0.953702	0.954197	0.937796	0.838153	0.951464	0	1	1	0.98833	0.720749	0.666731	2015-09-16	2015-09-25 11:38:44	7.01112
506	01_red_delta_94_10		0	0	0	0.939831	0.889995	0.914728	0.954565	0.909184	0	1	1	0.877042	0.675916	0.848939	2015-09-16	2015-09-25 11:38:44	7.0102
537	01_red_delta_95_10		0	0	0	0.948748	0.859488	0.976727	0.976075	0.848082	0	1	1	0.893321	0.672061	0.833752	2015-09-16	2015-09-25 11:38:44	7.00825
88	01_red_delta_80_26		0	0	0	0.861192	0.903019	0.96328	0.984947	0.973045	0	1	1	0.917952	0.715827	0.687911	2015-09-16	2015-09-25 11:38:44	7.00717
158	01_red_delta_83_3		0	0	0	0.953208	0.955621	0.925724	0.894614	0.918825	0	1	1	0.998725	0.754033	0.604525	2015-09-16	2015-09-25 11:38:44	7.00528
452	01_red_delta_92_18		0	0	0	0.937127	0.803343	0.969264	0.97582	0.866976	0	1	1	0.928406	0.630156	0.892802	2015-09-16	2015-09-25 11:38:44	7.00389
415	01_red_delta_91_12		0	0	0	0.936036	0.839174	0.935001	0.965024	0.848538	0	1	1	0.987128	0.568149	0.923546	2015-09-16	2015-09-25 11:38:44	7.00259
574	01_red_delta_96_16		0	0	0	0.947173	0.848864	0.923197	0.906397	0.846834	0	1	1	0.960852	0.624984	0.94228	2015-09-16	2015-09-25 11:38:44	7.00058
504	01_red_delta_94_8		0	0	0	0.943867	0.835997	0.965977	0.97605	0.920596	0	1	1	0.957521	0.484939	0.913667	2015-09-16	2015-09-25 11:38:44	6.99861
389	01_red_delta_90_17		0	0	0	0.892166	0.833192	0.970595	0.956656	0.943756	0	1	1	0.952401	0.55977	0.889274	2015-09-16	2015-09-25 11:38:44	6.99781
96	01_red_delta_81_3		0	0	0	0.955471	0.963512	0.83276	0.912992	0.948392	0	1	1	0.999996	0.875876	0.508215	2015-09-16	2015-09-25 11:38:44	6.99721
414	01_red_delta_91_11		0	0	0	0.928154	0.915878	0.930062	0.958724	0.968983	0	1	1	0.975627	0.37067	0.939821	2015-09-16	2015-09-25 11:38:44	6.98792
447	01_red_delta_92_13		0	0	0	0.93708	0.829483	0.95312	0.959256	0.878668	0	1	1	0.936852	0.585641	0.907176	2015-09-16	2015-09-25 11:38:44	6.98728
535	01_red_delta_95_8		0	0	0	0.969267	0.742942	0.943831	0.980388	0.848517	0	1	1	0.942387	0.738375	0.821131	2015-09-16	2015-09-25 11:38:44	6.98684
189	01_red_delta_84_3		0	0	0	0.945354	0.956758	0.878734	0.892377	0.928239	0	1	1	0.995853	0.757262	0.632245	2015-09-16	2015-09-25 11:38:44	6.98682
328	01_red_delta_88_18		0	0	0	0.895458	0.896968	0.92088	0.992249	0.960978	0	1	1	0.911142	0.535009	0.873541	2015-09-16	2015-09-25 11:38:44	6.98623
359	01_red_delta_89_18		0	0	0	0.904151	0.868302	0.956522	0.98129	0.966123	0	1	1	0.877991	0.564783	0.866306	2015-09-16	2015-09-25 11:38:44	6.98547
327	01_red_delta_88_17		0	0	0	0.891705	0.893522	0.9294	0.993066	0.950855	0	1	1	0.935877	0.4917	0.898747	2015-09-16	2015-09-25 11:38:44	6.98487
335	01_red_delta_88_25		0	0	0	0.891687	0.860441	0.94682	0.990764	0.911059	0	1	1	0.952828	0.584991	0.84365	2015-09-16	2015-09-25 11:38:44	6.98224
156	01_red_delta_83_1		0	0	0	0.965233	0.956039	0.951332	0.80509	0.84764	0	1	1	0.998838	0.800468	0.657219	2015-09-16	2015-09-25 11:38:44	6.98186
245	01_red_delta_85_28		0	0	0	0.884908	0.932448	0.982026	0.984604	0.95176	0	1	1	0.980283	0.661594	0.603923	2015-09-16	2015-09-25 11:38:44	6.98155
450	01_red_delta_92_16		0	0	0	0.930649	0.767087	0.913657	0.957144	0.93063	0	1	1	0.954356	0.596735	0.930839	2015-09-16	2015-09-25 11:38:44	6.9811
329	01_red_delta_88_19		0	0	0	0.893742	0.859592	0.986761	0.993206	0.933068	0	1	1	0.873854	0.608357	0.830811	2015-09-16	2015-09-25 11:38:44	6.97939
430	01_red_delta_91_27		0	0	0	0.905378	0.855309	0.924172	0.969109	0.914409	0	1	1	0.926863	0.632467	0.851593	2015-09-16	2015-09-25 11:38:44	6.9793
438	01_red_delta_92_4		0	0	0	0.969425	0.874587	0.942173	0.920503	0.844732	0	1	1	0.947464	0.776422	0.700702	2015-09-16	2015-09-25 11:38:44	6.97601
395	01_red_delta_90_23		0	0	0	0.907729	0.835124	0.934098	0.979987	0.906933	0	1	1	0.963989	0.540323	0.902858	2015-09-16	2015-09-25 11:38:44	6.97104
498	01_red_delta_94_2		0	0	0	0.969099	0.886536	0.966126	0.765216	0.896985	0	1	1	0.988245	0.636978	0.858649	2015-09-16	2015-09-25 11:38:44	6.96783
211	01_red_delta_84_25		0	0	0	0.869303	0.922979	0.984109	0.998011	0.973175	0	1	1	0.986369	0.635376	0.59701	2015-09-16	2015-09-25 11:38:44	6.96633
475	01_red_delta_93_10		0	0	0	0.947214	0.844488	0.886428	0.962522	0.882821	0	1	1	0.959702	0.534393	0.946107	2015-09-16	2015-09-25 11:38:44	6.96367
437	01_red_delta_92_3		0	0	0	0.955473	0.887038	0.948801	0.915504	0.910084	0	1	1	0.996847	0.446426	0.9003	2015-09-16	2015-09-25 11:38:44	6.96047
126	01_red_delta_82_2		0	0	0	0.948435	0.957619	0.902668	0.894646	0.919307	0	1	1	0.999071	0.736033	0.601149	2015-09-16	2015-09-25 11:38:44	6.95893
64	01_red_delta_80_2		0	0	0	0.943296	0.963032	0.931443	0.901953	0.901879	0	1	1	0.993618	0.732641	0.590775	2015-09-16	2015-09-25 11:38:44	6.95864
369	01_red_delta_89_28		0	0	0	0.900524	0.799888	0.965585	0.991334	0.904889	0	1	1	0.9246	0.630913	0.839931	2015-09-16	2015-09-25 11:38:44	6.95766
219	01_red_delta_85_2		0	0	0	0.950051	0.950134	0.924711	0.929961	0.877239	0	1	1	0.997407	0.731307	0.596136	2015-09-16	2015-09-25 11:38:44	6.95695
482	01_red_delta_93_17		0	0	0	0.923379	0.800024	0.948021	0.948176	0.880521	0	1	1	0.951207	0.601463	0.903291	2015-09-16	2015-09-25 11:38:44	6.95608
334	01_red_delta_88_24		0	0	0	0.892536	0.869994	0.920275	0.968901	0.935942	0	1	1	0.902306	0.596784	0.867788	2015-09-16	2015-09-25 11:38:44	6.95453
184	01_red_delta_83_29		0	0	0	0.883027	0.931556	0.983074	0.996753	0.929856	0	1	1	0.996833	0.633337	0.598364	2015-09-16	2015-09-25 11:38:44	6.9528
593	01_red_delta_97_4		0	0	0	0.974001	0.861655	0.985639	0.754753	0.740011	0	1	1	0.944248	0.819881	0.870259	2015-09-16	2015-09-25 11:38:44	6.95045
367	01_red_delta_89_26		0	0	0	0.888482	0.87181	0.940414	0.972968	0.927201	0	1	1	0.875565	0.607764	0.866026	2015-09-16	2015-09-25 11:38:44	6.95023
420	01_red_delta_91_17		0	0	0	0.903698	0.819789	0.927807	0.985196	0.941592	0	1	1	0.923941	0.523972	0.923864	2015-09-16	2015-09-25 11:38:44	6.94986
455	01_red_delta_92_21		0	0	0	0.924577	0.776993	0.942602	0.94042	0.923592	0	1	1	0.938296	0.609621	0.892774	2015-09-16	2015-09-25 11:38:44	6.94887
396	01_red_delta_90_24		0	0	0	0.891701	0.776913	0.950287	0.96828	0.951711	0	1	1	0.940795	0.591289	0.874364	2015-09-16	2015-09-25 11:38:44	6.94534
151	01_red_delta_82_27		0	0	0	0.878571	0.922828	0.994669	0.98115	0.971567	0	1	1	0.998552	0.678729	0.517418	2015-09-16	2015-09-25 11:38:44	6.94349
536	01_red_delta_95_9		0	0	0	0.963377	0.731309	0.965618	0.877792	0.858102	0	1	1	0.944248	0.728353	0.87362	2015-09-16	2015-09-25 11:38:44	6.94242
425	01_red_delta_91_22		0	0	0	0.908888	0.816218	0.901475	0.965285	0.904045	0	1	1	0.968483	0.556616	0.921272	2015-09-16	2015-09-25 11:38:44	6.94228
474	01_red_delta_93_9		0	0	0	0.94197	0.821887	0.915612	0.961951	0.9502	0	1	1	0.933518	0.503698	0.913375	2015-09-16	2015-09-25 11:38:44	6.94221
128	01_red_delta_82_4		0	0	0	0.937588	0.93805	0.943873	0.89114	0.856829	0	1	1	0.995218	0.727462	0.645957	2015-09-16	2015-09-25 11:38:44	6.93612
121	01_red_delta_81_28		0	0	0	0.872929	0.949246	0.980884	0.98711	0.937508	0	1	1	0.953984	0.638001	0.6162	2015-09-16	2015-09-25 11:38:44	6.93586
183	01_red_delta_83_28		0	0	0	0.876771	0.923365	0.981211	0.980075	0.941445	0	1	1	0.98765	0.622644	0.618773	2015-09-16	2015-09-25 11:38:44	6.93193
129	01_red_delta_82_5		0	0	0	0.919312	0.964226	0.925441	0.904432	0.9036	0	1	1	0.981517	0.601815	0.72901	2015-09-16	2015-09-25 11:38:44	6.92935
221	01_red_delta_85_4		0	0	0	0.950089	0.901575	0.858934	0.919038	0.947186	0	1	1	0.99048	0.808439	0.553437	2015-09-16	2015-09-25 11:38:44	6.92918
68	01_red_delta_80_6		0	0	0	0.921341	0.957233	0.926513	0.943318	0.845819	0	1	1	0.987159	0.700677	0.64572	2015-09-16	2015-09-25 11:38:44	6.92778
217	01_red_delta_85_0		0	0	0	0.957876	0.959829	0.883837	0.890361	0.933929	0	1	1	0.998917	0.716841	0.584576	2015-09-16	2015-09-25 11:38:44	6.92616
188	01_red_delta_84_2		0	0	0	0.95307	0.927589	0.9315	0.878364	0.90436	0	1	1	0.99922	0.71894	0.609555	2015-09-16	2015-09-25 11:38:44	6.9226
331	01_red_delta_88_21		0	0	0	0.885096	0.879572	0.954834	0.965229	0.939437	0	1	1	0.869466	0.541032	0.884768	2015-09-16	2015-09-25 11:38:44	6.91943
311	01_red_delta_88_1		0	0	0	0.970626	0.942364	0.850957	0.87596	0.923356	0	1	1	0.992161	0.829254	0.53424	2015-09-16	2015-09-25 11:38:44	6.91892
515	01_red_delta_94_19		0	0	0	0.939179	0.747838	0.881273	0.914477	0.890068	0	1	1	0.97858	0.624475	0.940548	2015-09-16	2015-09-25 11:38:44	6.91644
213	01_red_delta_84_27		0	0	0	0.86805	0.917783	0.991071	0.992117	0.957816	0	1	1	0.996405	0.677884	0.514384	2015-09-16	2015-09-25 11:38:44	6.91551
507	01_red_delta_94_11		0	0	0	0.945399	0.811747	0.929444	0.925832	0.924363	0	1	1	0.879918	0.577655	0.91956	2015-09-16	2015-09-25 11:38:44	6.91392
90	01_red_delta_80_28		0	0	0	0.855621	0.918952	0.98288	0.996052	0.933266	0	1	1	0.999693	0.649558	0.577776	2015-09-16	2015-09-25 11:38:44	6.9138
182	01_red_delta_83_27		0	0	0	0.884389	0.901547	0.990923	0.996948	0.970202	0	1	1	0.982586	0.715874	0.470126	2015-09-16	2015-09-25 11:38:44	6.91259
481	01_red_delta_93_16		0	0	0	0.939687	0.776555	0.886111	0.947351	0.872048	0	1	1	0.970638	0.58131	0.935165	2015-09-16	2015-09-25 11:38:44	6.90887
456	01_red_delta_92_22		0	0	0	0.91711	0.855939	0.899209	0.96147	0.89335	0	1	1	0.931594	0.529174	0.91906	2015-09-16	2015-09-25 11:38:44	6.90691
366	01_red_delta_89_25		0	0	0	0.886076	0.830497	0.95331	0.938914	0.88847	0	1	1	0.942904	0.596602	0.869609	2015-09-16	2015-09-25 11:38:44	6.90638
185	01_red_delta_83_30		0	0	0	0.87026	0.918322	0.9825	0.999505	0.94023	0	1	1	0.989731	0.648331	0.556773	2015-09-16	2015-09-25 11:38:44	6.90565
451	01_red_delta_92_17		0	0	0	0.922421	0.79189	0.926231	0.935469	0.925375	0	1	1	0.931652	0.550262	0.921329	2015-09-16	2015-09-25 11:38:44	6.90463
122	01_red_delta_81_29		0	0	0	0.869554	0.894129	0.982499	0.99142	0.953241	0	1	1	0.993873	0.644822	0.573123	2015-09-16	2015-09-25 11:38:44	6.90266
472	01_red_delta_93_7		0	0	0	0.951994	0.896782	0.833319	0.967291	0.91118	0	1	1	0.998749	0.378183	0.961382	2015-09-16	2015-09-25 11:38:44	6.89888
65	01_red_delta_80_3		0	0	0	0.939422	0.93354	0.893543	0.904645	0.957725	0	1	1	0.989746	0.781914	0.497396	2015-09-16	2015-09-25 11:38:44	6.89793
429	01_red_delta_91_26		0	0	0	0.904474	0.819099	0.92499	0.942447	0.921369	0	1	1	0.913443	0.594543	0.875115	2015-09-16	2015-09-25 11:38:44	6.89548
560	01_red_delta_96_2		0	0	0	0.973201	0.856817	0.964076	0.836939	0.735412	0	1	1	0.948223	0.811751	0.763262	2015-09-16	2015-09-25 11:38:44	6.88968
393	01_red_delta_90_21		0	0	0	0.901692	0.846281	0.894814	0.98869	0.875124	0	1	1	0.944217	0.534545	0.902482	2015-09-16	2015-09-25 11:38:44	6.88784
125	01_red_delta_82_1		0	0	0	0.946543	0.956382	0.938384	0.883614	0.834269	0	1	1	0.998773	0.695093	0.633902	2015-09-16	2015-09-25 11:38:44	6.88696
435	01_red_delta_92_1		0	0	0	0.966561	0.929212	0.978121	0.831198	0.857172	0	1	1	0.978279	0.642186	0.703126	2015-09-16	2015-09-25 11:38:44	6.88585
216	01_red_delta_84_30		0	0	0	0.872622	0.932119	0.96302	0.970615	0.910519	0	1	1	0.972115	0.642346	0.622108	2015-09-16	2015-09-25 11:38:44	6.88546
248	01_red_delta_86_0		0	0	0	0.960432	0.916853	0.912911	0.842746	0.936952	0	1	1	0.994409	0.682608	0.63587	2015-09-16	2015-09-25 11:38:44	6.88278
215	01_red_delta_84_29		0	0	0	0.854395	0.917551	0.976585	0.991853	0.922483	0	1	1	0.969856	0.63425	0.612462	2015-09-16	2015-09-25 11:38:44	6.87944
157	01_red_delta_83_2		0	0	0	0.951101	0.949795	0.924546	0.861019	0.875261	0	1	1	0.999978	0.667412	0.644551	2015-09-16	2015-09-25 11:38:44	6.87366
343	01_red_delta_89_2		0	0	0	0.964158	0.9164	0.820018	0.901833	0.91451	0	1	1	0.981634	0.801464	0.573536	2015-09-16	2015-09-25 11:38:44	6.87355
531	01_red_delta_95_4		0	0	0	0.963307	0.869638	0.931151	0.853147	0.87517	0	1	1	0.975759	0.492915	0.912153	2015-09-16	2015-09-25 11:38:44	6.87324
390	01_red_delta_90_18		0	0	0	0.912427	0.802835	0.901168	0.977636	0.912515	0	1	1	0.923821	0.512787	0.927235	2015-09-16	2015-09-25 11:38:44	6.87042
218	01_red_delta_85_1		0	0	0	0.955885	0.947064	0.902421	0.866241	0.918334	0	1	1	0.992733	0.700556	0.585173	2015-09-16	2015-09-25 11:38:44	6.86841
123	01_red_delta_81_30		0	0	0	0.863571	0.905919	0.985594	0.996487	0.945118	0	1	1	0.960427	0.662697	0.548413	2015-09-16	2015-09-25 11:38:44	6.86823
476	01_red_delta_93_11		0	0	0	0.946804	0.784025	0.859864	0.950663	0.904175	0	1	1	0.989041	0.498078	0.933807	2015-09-16	2015-09-25 11:38:44	6.86646
439	01_red_delta_92_5		0	0	0	0.952176	0.911644	0.877715	0.964099	0.955278	0	1	1	0.904993	0.413346	0.885958	2015-09-16	2015-09-25 11:38:44	6.86521
339	01_red_delta_88_29		0	0	0	0.901356	0.857916	0.951235	0.958268	0.920781	0	1	1	0.996181	0.58325	0.695136	2015-09-16	2015-09-25 11:38:44	6.86412
569	01_red_delta_96_11		0	0	0	0.956904	0.651539	0.9786	0.906568	0.875263	0	1	1	0.927478	0.654834	0.908969	2015-09-16	2015-09-25 11:38:44	6.86016
405	01_red_delta_91_2		0	0	0	0.967364	0.911219	0.966895	0.921457	0.871097	0	1	1	0.980268	0.69602	0.541383	2015-09-16	2015-09-25 11:38:44	6.8557
552	01_red_delta_95_25		0	0	0	0.938359	0.727292	0.927744	0.941787	0.859255	0	1	1	0.919259	0.642608	0.895696	2015-09-16	2015-09-25 11:38:44	6.852
424	01_red_delta_91_21		0	0	0	0.920545	0.822846	0.854127	0.974663	0.886418	0	1	1	0.936963	0.532143	0.923929	2015-09-16	2015-09-25 11:38:44	6.85163
92	01_red_delta_80_30		0	0	0	0.866592	0.90096	0.958365	0.987812	0.910982	0	1	1	0.997978	0.636108	0.590638	2015-09-16	2015-09-25 11:38:44	6.84944
606	01_red_delta_97_17		0	0	0	0.945568	0.722336	0.931035	0.932032	0.842377	0	1	1	0.912874	0.640484	0.921486	2015-09-16	2015-09-25 11:38:44	6.84819
247	01_red_delta_85_30		0	0	0	0.892721	0.877467	0.988163	0.967407	0.908454	0	1	1	0.957663	0.671971	0.582785	2015-09-16	2015-09-25 11:38:44	6.84663
62	01_red_delta_80_0		0	0	0	0.954527	0.95329	0.908732	0.821856	0.921504	0	1	1	0.999428	0.75931	0.5252	2015-09-16	2015-09-25 11:38:44	6.84385
510	01_red_delta_94_14		0	0	0	0.943441	0.811078	0.879377	0.920774	0.905613	0	1	1	0.919204	0.517198	0.944878	2015-09-16	2015-09-25 11:38:44	6.84156
91	01_red_delta_80_29		0	0	0	0.848238	0.938665	0.990421	0.974044	0.939194	0	1	1	0.979159	0.685581	0.480158	2015-09-16	2015-09-25 11:38:44	6.83546
155	01_red_delta_83_0		0	0	0	0.952036	0.958574	0.862795	0.90155	0.887467	0	1	1	0.999983	0.762402	0.507366	2015-09-16	2015-09-25 11:38:44	6.83217
525	01_red_delta_94_29		0	0	0	0.924559	0.761043	0.878021	0.955079	0.883564	0	1	1	0.926127	0.589677	0.913739	2015-09-16	2015-09-25 11:38:44	6.83181
487	01_red_delta_93_22		0	0	0	0.909231	0.775915	0.908965	0.941712	0.88082	0	1	1	0.947901	0.559051	0.908109	2015-09-16	2015-09-25 11:38:44	6.8317
419	01_red_delta_91_16		0	0	0	0.923097	0.861652	0.86168	0.95497	0.913567	0	1	1	0.920455	0.43936	0.954135	2015-09-16	2015-09-25 11:38:44	6.82892
278	01_red_delta_86_30		0	0	0	0.880095	0.857206	0.937006	0.991753	0.924291	0	1	1	0.951027	0.607785	0.677505	2015-09-16	2015-09-25 11:38:44	6.82667
458	01_red_delta_92_24		0	0	0	0.900791	0.773071	0.899069	0.970213	0.910474	0	1	1	0.880226	0.57028	0.922437	2015-09-16	2015-09-25 11:38:44	6.82656
434	01_red_delta_92_0		0	0	0	0.971274	0.907004	0.928485	0.844705	0.84303	0	1	1	0.97454	0.677567	0.678826	2015-09-16	2015-09-25 11:38:44	6.82543
591	01_red_delta_97_2		0	0	0	0.977641	0.773026	0.97738	0.908739	0.677571	0	1	1	0.975454	0.871543	0.663704	2015-09-16	2015-09-25 11:38:44	6.82506
152	01_red_delta_82_28		0	0	0	0.862039	0.90095	0.992775	0.998607	0.925664	0	1	1	0.999855	0.689963	0.454525	2015-09-16	2015-09-25 11:38:44	6.82438
153	01_red_delta_82_29		0	0	0	0.859952	0.94569	0.983019	0.968182	0.91095	0	1	1	0.985639	0.659646	0.509694	2015-09-16	2015-09-25 11:38:44	6.82277
540	01_red_delta_95_13		0	0	0	0.941761	0.909357	0.821623	0.901234	0.887281	0	1	1	0.97326	0.443278	0.937591	2015-09-16	2015-09-25 11:38:44	6.81538
363	01_red_delta_89_22		0	0	0	0.867615	0.786742	0.901187	0.966151	0.947233	0	1	1	0.992306	0.468693	0.884932	2015-09-16	2015-09-25 11:38:44	6.81486
493	01_red_delta_93_28		0	0	0	0.917022	0.82349	0.87811	0.944126	0.872101	0	1	1	0.916129	0.579809	0.884061	2015-09-16	2015-09-25 11:38:44	6.81485
499	01_red_delta_94_3		0	0	0	0.964049	0.800319	0.988468	0.909048	0.820097	0	1	1	0.957029	0.526795	0.848575	2015-09-16	2015-09-25 11:38:44	6.81438
612	01_red_delta_97_23		0	0	0	0.934878	0.733411	0.857291	0.931998	0.888358	0	1	1	0.937997	0.584379	0.945074	2015-09-16	2015-09-25 11:38:44	6.81339
397	01_red_delta_90_25		0	0	0	0.859631	0.86931	0.926441	0.967397	0.900566	0	1	1	0.873753	0.528552	0.885614	2015-09-16	2015-09-25 11:38:44	6.81126
89	01_red_delta_80_27		0	0	0	0.816183	0.924045	0.964468	0.989026	0.936473	0	1	1	0.996514	0.592844	0.588828	2015-09-16	2015-09-25 11:38:44	6.80838
63	01_red_delta_80_1		0	0	0	0.954334	0.916893	0.894716	0.874692	0.868461	0	1	1	0.968885	0.725108	0.601865	2015-09-16	2015-09-25 11:38:44	6.80495
539	01_red_delta_95_12		0	0	0	0.944014	0.827282	0.818109	0.954388	0.897122	0	1	1	0.968311	0.447543	0.947948	2015-09-16	2015-09-25 11:38:44	6.80472
275	01_red_delta_86_27		0	0	0	0.865741	0.845341	0.973806	0.981902	0.948994	0	1	1	0.956364	0.580096	0.64858	2015-09-16	2015-09-25 11:38:44	6.80083
120	01_red_delta_81_27		0	0	0	0.838945	0.908008	0.98782	0.965774	0.927428	0	1	1	0.991374	0.590801	0.587627	2015-09-16	2015-09-25 11:38:44	6.79778
394	01_red_delta_90_22		0	0	0	0.883745	0.860862	0.869879	0.9749	0.934391	0	1	1	0.878854	0.457471	0.931934	2015-09-16	2015-09-25 11:38:44	6.79204
431	01_red_delta_91_28		0	0	0	0.891462	0.838524	0.886906	0.97338	0.928186	0	1	1	0.872242	0.506023	0.895165	2015-09-16	2015-09-25 11:38:44	6.79189
524	01_red_delta_94_28		0	0	0	0.902145	0.788032	0.883818	0.939221	0.890867	0	1	1	0.962212	0.507477	0.918091	2015-09-16	2015-09-25 11:38:44	6.79186
400	01_red_delta_90_28		0	0	0	0.912163	0.83613	0.942755	0.95821	0.911439	0	1	1	0.88914	0.647533	0.691433	2015-09-16	2015-09-25 11:38:44	6.7888
154	01_red_delta_82_30		0	0	0	0.850396	0.891417	0.97917	0.99464	0.9345	0	1	1	0.916104	0.614066	0.605502	2015-09-16	2015-09-25 11:38:44	6.7858
277	01_red_delta_86_29		0	0	0	0.872722	0.87947	0.991959	0.969505	0.894065	0	1	1	0.967974	0.67247	0.537106	2015-09-16	2015-09-25 11:38:44	6.78527
576	01_red_delta_96_18		0	0	0	0.9488	0.738021	0.874886	0.932741	0.77581	0	1	1	0.922249	0.660432	0.927852	2015-09-16	2015-09-25 11:38:44	6.78079
449	01_red_delta_92_15		0	0	0	0.922196	0.844909	0.85496	0.949781	0.915871	0	1	1	0.904588	0.439093	0.947869	2015-09-16	2015-09-25 11:38:44	6.77927
511	01_red_delta_94_15		0	0	0	0.93013	0.717275	0.928779	0.961749	0.877931	0	1	1	0.927276	0.503676	0.931156	2015-09-16	2015-09-25 11:38:44	6.77797
483	01_red_delta_93_18		0	0	0	0.922222	0.855617	0.884711	0.958835	0.866286	0	1	1	0.848314	0.499272	0.939203	2015-09-16	2015-09-25 11:38:44	6.77446
124	01_red_delta_82_0		0	0	0	0.960438	0.929909	0.871491	0.894888	0.854408	0	1	1	0.99097	0.732251	0.538834	2015-09-16	2015-09-25 11:38:44	6.77319
514	01_red_delta_94_18		0	0	0	0.920297	0.79978	0.833306	0.931972	0.933543	0	1	1	0.949262	0.469674	0.934473	2015-09-16	2015-09-25 11:38:44	6.77231
497	01_red_delta_94_1		0	0	0	0.971283	0.898802	0.956445	0.853044	0.766584	0	1	1	0.999511	0.52994	0.796578	2015-09-16	2015-09-25 11:38:44	6.77219
372	01_red_delta_90_0		0	0	0	0.966225	0.92773	0.863559	0.878349	0.906999	0	1	1	0.994542	0.513777	0.719696	2015-09-16	2015-09-25 11:38:44	6.77088
241	01_red_delta_85_24		0	0	0	0.805468	0.920944	0.942756	0.994815	0.947547	0	1	1	0.805874	0.500342	0.851572	2015-09-16	2015-09-25 11:38:44	6.76932
94	01_red_delta_81_1		0	0	0	0.934628	0.957163	0.925518	0.901209	0.82763	0	1	1	0.999725	0.638109	0.5803	2015-09-16	2015-09-25 11:38:44	6.76428
423	01_red_delta_91_20		0	0	0	0.902348	0.795814	0.917686	0.944233	0.91746	0	1	1	0.879856	0.487177	0.918933	2015-09-16	2015-09-25 11:38:44	6.76351
310	01_red_delta_88_0		0	0	0	0.971624	0.936762	0.840873	0.896354	0.771154	0	1	1	0.993205	0.840069	0.512176	2015-09-16	2015-09-25 11:38:44	6.76221
486	01_red_delta_93_21		0	0	0	0.914387	0.761487	0.89093	0.942539	0.893464	0	1	1	0.951956	0.482316	0.924917	2015-09-16	2015-09-25 11:38:44	6.762
246	01_red_delta_85_29		0	0	0	0.848624	0.876256	0.982318	0.990708	0.936195	0	1	1	0.891507	0.640368	0.595946	2015-09-16	2015-09-25 11:38:44	6.76192
547	01_red_delta_95_20		0	0	0	0.933562	0.850117	0.898537	0.890286	0.809102	0	1	1	0.899432	0.541683	0.938592	2015-09-16	2015-09-25 11:38:44	6.76131
603	01_red_delta_97_14		0	0	0	0.956179	0.773894	0.846176	0.929428	0.803995	0	1	1	0.938248	0.570064	0.942864	2015-09-16	2015-09-25 11:38:44	6.76085
401	01_red_delta_90_29		0	0	0	0.89032	0.757018	0.957638	0.969894	0.77498	0	1	1	0.93723	0.614448	0.858321	2015-09-16	2015-09-25 11:38:44	6.75985
338	01_red_delta_88_28		0	0	0	0.859913	0.76302	0.907956	0.959539	0.918499	0	1	1	0.939813	0.517263	0.89135	2015-09-16	2015-09-25 11:38:44	6.75735
368	01_red_delta_89_27		0	0	0	0.835037	0.82649	0.918768	0.951945	0.94623	0	1	1	0.908895	0.476349	0.892603	2015-09-16	2015-09-25 11:38:44	6.75632
608	01_red_delta_97_19		0	0	0	0.937771	0.798903	0.854932	0.871758	0.810137	0	1	1	0.913736	0.617865	0.950043	2015-09-16	2015-09-25 11:38:44	6.75515
426	01_red_delta_91_23		0	0	0	0.903068	0.839744	0.928924	0.925257	0.881122	0	1	1	0.862231	0.507308	0.900856	2015-09-16	2015-09-25 11:38:44	6.74851
461	01_red_delta_92_27		0	0	0	0.900839	0.763478	0.890672	0.978634	0.901643	0	1	1	0.858867	0.575432	0.876937	2015-09-16	2015-09-25 11:38:44	6.7465
341	01_red_delta_89_0		0	0	0	0.970778	0.898817	0.947917	0.669565	0.86594	0	1	1	0.969639	0.748725	0.674718	2015-09-16	2015-09-25 11:38:44	6.7461
342	01_red_delta_89_1		0	0	0	0.967513	0.934642	0.780187	0.896021	0.885604	0	1	1	0.999943	0.748587	0.533103	2015-09-16	2015-09-25 11:38:44	6.7456
598	01_red_delta_97_9		0	0	0	0.963515	0.733721	0.835792	0.914377	0.788059	0	1	1	0.950865	0.580838	0.972572	2015-09-16	2015-09-25 11:38:44	6.73974
371	01_red_delta_89_30		0	0	0	0.902785	0.858105	0.968505	0.904915	0.841304	0	1	1	0.952729	0.648791	0.660957	2015-09-16	2015-09-25 11:38:44	6.73809
186	01_red_delta_84_0		0	0	0	0.960108	0.956082	0.85017	0.844072	0.857751	0	1	1	0.999266	0.728907	0.539336	2015-09-16	2015-09-25 11:38:44	6.73569
428	01_red_delta_91_25		0	0	0	0.888518	0.767714	0.926801	0.974098	0.873898	0	1	1	0.875676	0.54766	0.879877	2015-09-16	2015-09-25 11:38:44	6.73424
214	01_red_delta_84_28		0	0	0	0.83177	0.896035	0.988786	0.988448	0.891327	0	1	1	0.999995	0.59925	0.534361	2015-09-16	2015-09-25 11:38:44	6.72997
365	01_red_delta_89_24		0	0	0	0.856572	0.829772	0.845424	0.98239	0.930749	0	1	1	0.957143	0.40928	0.918114	2015-09-16	2015-09-25 11:38:44	6.72944
93	01_red_delta_81_0		0	0	0	0.954082	0.930204	0.843994	0.885951	0.847381	0	1	1	0.986258	0.732579	0.548013	2015-09-16	2015-09-25 11:38:44	6.72846
398	01_red_delta_90_26		0	0	0	0.859443	0.849893	0.911764	0.97848	0.885335	0	1	1	0.855429	0.493914	0.893781	2015-09-16	2015-09-25 11:38:44	6.72804
485	01_red_delta_93_20		0	0	0	0.911976	0.836126	0.878833	0.950925	0.844004	0	1	1	0.91001	0.456952	0.938206	2015-09-16	2015-09-25 11:38:44	6.72703
340	01_red_delta_88_30		0	0	0	0.874221	0.821801	0.947814	0.982865	0.868402	0	1	1	0.929882	0.625885	0.673374	2015-09-16	2015-09-25 11:38:44	6.72424
518	01_red_delta_94_22		0	0	0	0.917164	0.802674	0.806949	0.925923	0.908483	0	1	1	0.931778	0.48567	0.941137	2015-09-16	2015-09-25 11:38:44	6.71978
596	01_red_delta_97_7		0	0	0	0.959457	0.844198	0.854558	0.887999	0.819636	0	1	1	0.965524	0.476526	0.910679	2015-09-16	2015-09-25 11:38:44	6.71858
467	01_red_delta_93_2		0	0	0	0.957111	0.896559	0.862788	0.946732	0.879974	0	1	1	0.974099	0.264463	0.934497	2015-09-16	2015-09-25 11:38:44	6.71622
523	01_red_delta_94_27		0	0	0	0.901712	0.771448	0.900139	0.89915	0.882412	0	1	1	0.906169	0.540811	0.913869	2015-09-16	2015-09-25 11:38:44	6.71571
579	01_red_delta_96_21		0	0	0	0.938362	0.757991	0.884863	0.881631	0.801624	0	1	1	0.928746	0.573678	0.932756	2015-09-16	2015-09-25 11:38:44	6.69965
484	01_red_delta_93_19		0	0	0	0.939442	0.762122	0.82854	0.945302	0.87722	0	1	1	0.907622	0.498349	0.937982	2015-09-16	2015-09-25 11:38:44	6.69658
555	01_red_delta_95_28		0	0	0	0.90379	0.759632	0.865031	0.936218	0.825928	0	1	1	0.939998	0.558881	0.900186	2015-09-16	2015-09-25 11:38:44	6.68967
522	01_red_delta_94_26		0	0	0	0.888552	0.771772	0.872696	0.931792	0.893296	0	1	1	0.945601	0.463342	0.922396	2015-09-16	2015-09-25 11:38:44	6.68945
399	01_red_delta_90_27		0	0	0	0.868853	0.860291	0.871932	0.942578	0.92514	0	1	1	0.852321	0.464345	0.903396	2015-09-16	2015-09-25 11:38:44	6.68886
463	01_red_delta_92_29		0	0	0	0.894405	0.771539	0.880741	0.95377	0.911382	0	1	1	0.881262	0.483703	0.902628	2015-09-16	2015-09-25 11:38:44	6.67943
580	01_red_delta_96_22		0	0	0	0.940432	0.661984	0.934797	0.860078	0.856127	0	1	1	0.901443	0.605433	0.914715	2015-09-16	2015-09-25 11:38:44	6.67501
309	01_red_delta_87_30		0	0	0	0.839376	0.837976	0.933655	0.96192	0.894124	0	1	1	0.923573	0.599865	0.678867	2015-09-16	2015-09-25 11:38:44	6.66936
572	01_red_delta_96_14		0	0	0	0.947455	0.709437	0.781835	0.937892	0.879164	0	1	1	0.996187	0.461424	0.955518	2015-09-16	2015-09-25 11:38:44	6.66891
582	01_red_delta_96_24		0	0	0	0.915218	0.805336	0.79164	0.91655	0.854511	0	1	1	0.95313	0.471099	0.960143	2015-09-16	2015-09-25 11:38:44	6.66763
519	01_red_delta_94_23		0	0	0	0.914282	0.690018	0.86714	0.908937	0.887961	0	1	1	0.954556	0.515457	0.9264	2015-09-16	2015-09-25 11:38:44	6.66475
513	01_red_delta_94_17		0	0	0	0.920004	0.840793	0.831277	0.915065	0.880399	0	1	1	0.894746	0.417823	0.959084	2015-09-16	2015-09-25 11:38:44	6.65919
370	01_red_delta_89_29		0	0	0	0.826922	0.866008	0.950832	0.980342	0.940891	0	1	1	0.8476	0.526801	0.716229	2015-09-16	2015-09-25 11:38:44	6.65562
403	01_red_delta_91_0		0	0	0	0.970217	0.914053	0.759146	0.92322	0.826752	0	1	1	0.991071	0.637704	0.632147	2015-09-16	2015-09-25 11:38:44	6.65431
529	01_red_delta_95_2		0	0	0	0.969838	0.920743	0.88786	0.869953	0.800531	0	1	1	0.921577	0.634624	0.644538	2015-09-16	2015-09-25 11:38:44	6.64966
561	01_red_delta_96_3		0	0	0	0.973108	0.864019	0.872328	0.768935	0.76496	0	1	1	0.969288	0.556581	0.87373	2015-09-16	2015-09-25 11:38:44	6.64295
551	01_red_delta_95_24		0	0	0	0.912091	0.800069	0.840148	0.90959	0.863081	0	1	1	0.886548	0.498362	0.93244	2015-09-16	2015-09-25 11:38:44	6.64233
599	01_red_delta_97_10		0	0	0	0.955291	0.72886	0.861373	0.917953	0.873732	0	1	1	0.874351	0.4717	0.956635	2015-09-16	2015-09-25 11:38:44	6.6399
627	01_red_delta_98_7		0	0	0	0.965087	0.779545	0.943761	0.791816	0.669945	0	1	1	0.957574	0.624378	0.905509	2015-09-16	2015-09-25 11:38:44	6.63762
546	01_red_delta_95_19		0	0	0	0.908764	0.782994	0.902427	0.922877	0.780121	0	1	1	0.933518	0.45886	0.94716	2015-09-16	2015-09-25 11:38:44	6.63672
427	01_red_delta_91_24		0	0	0	0.890199	0.734029	0.924477	0.927619	0.893343	0	1	1	0.838211	0.535257	0.893571	2015-09-16	2015-09-25 11:38:44	6.63671
308	01_red_delta_87_29		0	0	0	0.862612	0.865485	0.945641	0.953191	0.875836	0	1	1	0.851583	0.580904	0.691013	2015-09-16	2015-09-25 11:38:44	6.62627
558	01_red_delta_96_0		0	0	0	0.976858	0.796065	0.946528	0.733882	0.663326	0	1	1	0.977373	0.784484	0.74617	2015-09-16	2015-09-25 11:38:44	6.62469
615	01_red_delta_97_26		0	0	0	0.922899	0.777304	0.845001	0.853067	0.837271	0	1	1	0.935237	0.515386	0.936747	2015-09-16	2015-09-25 11:38:44	6.62291
594	01_red_delta_97_5		0	0	0	0.968372	0.776399	0.912087	0.742745	0.760218	0	1	1	0.940033	0.582862	0.933774	2015-09-16	2015-09-25 11:38:44	6.61649
538	01_red_delta_95_11		0	0	0	0.933831	0.864427	0.77964	0.85173	0.8952	0	1	1	0.97746	0.393915	0.917741	2015-09-16	2015-09-25 11:38:44	6.61395
517	01_red_delta_94_21		0	0	0	0.91399	0.716946	0.869683	0.921094	0.859249	0	1	1	0.909448	0.494132	0.928839	2015-09-16	2015-09-25 11:38:44	6.61338
454	01_red_delta_92_20		0	0	0	0.910469	0.729126	0.857108	0.927487	0.883297	0	1	1	0.892956	0.483158	0.929314	2015-09-16	2015-09-25 11:38:44	6.61291
545	01_red_delta_95_18		0	0	0	0.938248	0.673196	0.817801	0.910124	0.846768	0	1	1	0.966374	0.506005	0.952444	2015-09-16	2015-09-25 11:38:44	6.61096
577	01_red_delta_96_19		0	0	0	0.933851	0.747265	0.822023	0.932933	0.853945	0	1	1	0.890327	0.457323	0.970423	2015-09-16	2015-09-25 11:38:44	6.60809
433	01_red_delta_91_30		0	0	0	0.845553	0.806885	0.884745	0.95926	0.909254	0	1	1	0.853375	0.442968	0.89651	2015-09-16	2015-09-25 11:38:44	6.59855
464	01_red_delta_92_30		0	0	0	0.8878	0.833057	0.865131	0.976859	0.890934	0	1	1	0.816587	0.477435	0.845641	2015-09-16	2015-09-25 11:38:44	6.59344
460	01_red_delta_92_26		0	0	0	0.877289	0.835707	0.862851	0.938152	0.862836	0	1	1	0.881701	0.40245	0.932004	2015-09-16	2015-09-25 11:38:44	6.59299
544	01_red_delta_95_17		0	0	0	0.921027	0.720889	0.836256	0.939064	0.90731	0	1	1	0.861772	0.434751	0.961245	2015-09-16	2015-09-25 11:38:44	6.58231
645	01_red_delta_98_25		0	0	0	0.930997	0.747023	0.785564	0.871712	0.821296	0	1	1	0.925145	0.556497	0.941981	2015-09-16	2015-09-25 11:38:44	6.58021
584	01_red_delta_96_26		0	0	0	0.912807	0.713248	0.80799	0.911904	0.860441	0	1	1	0.950592	0.503732	0.9166	2015-09-16	2015-09-25 11:38:44	6.57731
453	01_red_delta_92_19		0	0	0	0.88718	0.748345	0.887195	0.9268	0.894616	0	1	1	0.855262	0.451957	0.921933	2015-09-16	2015-09-25 11:38:44	6.57329
605	01_red_delta_97_16		0	0	0	0.943805	0.682749	0.934657	0.893	0.755696	0	1	1	0.910762	0.499165	0.945277	2015-09-16	2015-09-25 11:38:44	6.56511
542	01_red_delta_95_15		0	0	0	0.937351	0.685463	0.841851	0.854576	0.890848	0	1	1	0.877668	0.53991	0.935893	2015-09-16	2015-09-25 11:38:44	6.56356
496	01_red_delta_94_0		0	0	0	0.969744	0.92565	0.882326	0.83977	0.772488	0	1	1	0.987553	0.486367	0.693091	2015-09-16	2015-09-25 11:38:44	6.55699
526	01_red_delta_94_30		0	0	0	0.877753	0.756859	0.816606	0.966006	0.851531	0	1	1	0.927104	0.431012	0.926619	2015-09-16	2015-09-25 11:38:44	6.55349
583	01_red_delta_96_25		0	0	0	0.915919	0.668508	0.86428	0.887352	0.868496	0	1	1	0.914656	0.502907	0.931188	2015-09-16	2015-09-25 11:38:44	6.55331
495	01_red_delta_93_30		0	0	0	0.910187	0.837934	0.909238	0.892437	0.878887	0	1	1	0.786165	0.563037	0.775005	2015-09-16	2015-09-25 11:38:44	6.55289
402	01_red_delta_90_30		0	0	0	0.885002	0.773497	0.903134	0.913095	0.852582	0	1	1	0.903077	0.518997	0.802914	2015-09-16	2015-09-25 11:38:44	6.5523
494	01_red_delta_93_29		0	0	0	0.884988	0.760263	0.877778	0.881253	0.877695	0	1	1	0.918454	0.442945	0.903502	2015-09-16	2015-09-25 11:38:44	6.54688
601	01_red_delta_97_12		0	0	0	0.952333	0.672077	0.844737	0.943983	0.716061	0	1	1	0.912661	0.531547	0.970189	2015-09-16	2015-09-25 11:38:44	6.54359
554	01_red_delta_95_27		0	0	0	0.888851	0.790118	0.773718	0.960897	0.876634	0	1	1	0.883881	0.451232	0.917611	2015-09-16	2015-09-25 11:38:44	6.54294
600	01_red_delta_97_11		0	0	0	0.948051	0.7924	0.766391	0.901817	0.819387	0	1	1	0.938842	0.39346	0.982576	2015-09-16	2015-09-25 11:38:44	6.54293
432	01_red_delta_91_29		0	0	0	0.851005	0.826767	0.927661	0.947199	0.866337	0	1	1	0.85037	0.524484	0.747817	2015-09-16	2015-09-25 11:38:44	6.54164
638	01_red_delta_98_18		0	0	0	0.946088	0.729909	0.873681	0.894917	0.714054	0	1	1	0.936982	0.488968	0.954353	2015-09-16	2015-09-25 11:38:44	6.53895
548	01_red_delta_95_21		0	0	0	0.92335	0.835647	0.774339	0.938821	0.881233	0	1	1	0.845713	0.377547	0.960325	2015-09-16	2015-09-25 11:38:44	6.53698
16	01_non_red_54		0	0	0	0.965018	0.851094	0.860833	0.816915	0.781777	0	1	1	0.963853	0.924419	0.372408	2015-09-15	2015-09-25 11:38:44	6.53632
595	01_red_delta_97_6		0	0	0	0.968094	0.547857	0.968326	0.872713	0.8871	0	1	1	0.907925	0.522428	0.861246	2015-09-16	2015-09-25 11:38:44	6.53569
585	01_red_delta_96_27		0	0	0	0.904792	0.780944	0.805156	0.944594	0.89542	0	1	1	0.81125	0.442561	0.945926	2015-09-16	2015-09-25 11:38:44	6.53064
520	01_red_delta_94_24		0	0	0	0.896572	0.744342	0.847487	0.944981	0.839351	0	1	1	0.885203	0.430959	0.938109	2015-09-16	2015-09-25 11:38:44	6.527
492	01_red_delta_93_27		0	0	0	0.882169	0.760296	0.842295	0.958655	0.876156	0	1	1	0.778622	0.52205	0.901426	2015-09-16	2015-09-25 11:38:44	6.52167
613	01_red_delta_97_24		0	0	0	0.906918	0.759136	0.819048	0.929741	0.753217	0	1	1	0.942904	0.456409	0.947115	2015-09-16	2015-09-25 11:38:44	6.51449
663	01_red_delta_99_12		0	0	0	0.967237	0.668087	0.894738	0.804157	0.633627	0	1	1	0.929489	0.668976	0.945935	2015-09-16	2015-09-25 11:38:44	6.51225
489	01_red_delta_93_24		0	0	0	0.896285	0.751395	0.847391	0.894848	0.884487	0	1	1	0.822509	0.468621	0.943628	2015-09-16	2015-09-25 11:38:44	6.50916
556	01_red_delta_95_29		0	0	0	0.902096	0.674189	0.846966	0.921911	0.884157	0	1	1	0.835893	0.513091	0.923688	2015-09-16	2015-09-25 11:38:44	6.50199
563	01_red_delta_96_5		0	0	0	0.963872	0.785018	0.919369	0.83641	0.645158	0	1	1	0.96795	0.553339	0.83073	2015-09-16	2015-09-25 11:38:44	6.50184
573	01_red_delta_96_15		0	0	0	0.923929	0.732746	0.807917	0.827178	0.788922	0	1	1	0.949504	0.494308	0.972637	2015-09-16	2015-09-25 11:38:44	6.49714
610	01_red_delta_97_21		0	0	0	0.931757	0.743291	0.835536	0.872893	0.763808	0	1	1	0.915954	0.486379	0.945112	2015-09-16	2015-09-25 11:38:44	6.49473
624	01_red_delta_98_4		0	0	0	0.975944	0.679386	0.983547	0.790737	0.487983	0	1	1	0.937852	0.78046	0.845938	2015-09-16	2015-09-25 11:38:44	6.48185
549	01_red_delta_95_22		0	0	0	0.901157	0.674693	0.808481	0.931445	0.896694	0	1	1	0.895024	0.421741	0.949377	2015-09-16	2015-09-25 11:38:44	6.47861
13	01_non_red_51		0	0	0	0.953763	0.88071	0.838732	0.78538	0.752947	0	1	1	0.970805	0.913671	0.381646	2015-09-15	2015-09-25 11:38:44	6.47765
564	01_red_delta_96_6		0	0	0	0.962702	0.724988	0.912328	0.816111	0.734976	0	1	1	0.875995	0.530531	0.91232	2015-09-16	2015-09-25 11:38:44	6.46995
521	01_red_delta_94_25		0	0	0	0.8777	0.768841	0.836924	0.952141	0.881756	0	1	1	0.807652	0.390049	0.953435	2015-09-16	2015-09-25 11:38:44	6.4685
527	01_red_delta_95_0		0	0	0	0.975284	0.857931	0.919036	0.620598	0.76103	0	1	1	0.934925	0.732383	0.666227	2015-09-16	2015-09-25 11:38:44	6.46741
543	01_red_delta_95_16		0	0	0	0.913818	0.775964	0.772434	0.906616	0.877511	0	1	1	0.933518	0.321351	0.966133	2015-09-16	2015-09-25 11:38:44	6.46734
623	01_red_delta_98_3		0	0	0	0.9776	0.679986	0.95677	0.602893	0.76361	0	1	1	0.951636	0.872843	0.660939	2015-09-16	2015-09-25 11:38:44	6.46628
557	01_red_delta_95_30		0	0	0	0.893302	0.76204	0.833337	0.938769	0.84783	0	1	1	0.821708	0.459119	0.908543	2015-09-16	2015-09-25 11:38:44	6.46465
587	01_red_delta_96_29		0	0	0	0.905893	0.70617	0.804299	0.915032	0.828276	0	1	1	0.945523	0.455485	0.902327	2015-09-16	2015-09-25 11:38:44	6.463
14	01_non_red_52		0	0	0	0.952072	0.89529	0.847085	0.774501	0.752137	0	1	1	0.956629	0.918875	0.365527	2015-09-15	2015-09-25 11:38:44	6.46212
491	01_red_delta_93_26		0	0	0	0.863954	0.714282	0.878558	0.955537	0.874533	0	1	1	0.852055	0.387981	0.934602	2015-09-16	2015-09-25 11:38:44	6.4615
562	01_red_delta_96_4		0	0	0	0.963179	0.832917	0.907813	0.757109	0.760128	0	1	1	0.902943	0.46661	0.858314	2015-09-16	2015-09-25 11:38:44	6.44901
553	01_red_delta_95_26		0	0	0	0.888359	0.722399	0.854034	0.916348	0.831829	0	1	1	0.845259	0.463365	0.924359	2015-09-16	2015-09-25 11:38:44	6.44595
541	01_red_delta_95_14		0	0	0	0.931603	0.757273	0.795584	0.902278	0.840318	0	1	1	0.898383	0.349846	0.962667	2015-09-16	2015-09-25 11:38:44	6.43795
578	01_red_delta_96_20		0	0	0	0.931677	0.731456	0.784008	0.887173	0.829357	0	1	1	0.871467	0.440751	0.960878	2015-09-16	2015-09-25 11:38:44	6.43677
465	01_red_delta_93_0		0	0	0	0.973435	0.916805	0.664132	0.840734	0.868252	0	1	1	0.937001	0.756353	0.477136	2015-09-16	2015-09-25 11:38:44	6.43385
629	01_red_delta_98_9		0	0	0	0.961808	0.77011	0.95763	0.782947	0.771307	0	1	1	0.845152	0.411019	0.931978	2015-09-16	2015-09-25 11:38:44	6.43195
604	01_red_delta_97_15		0	0	0	0.927372	0.763385	0.776728	0.907501	0.849708	0	1	1	0.865447	0.367434	0.973847	2015-09-16	2015-09-25 11:38:44	6.43142
570	01_red_delta_96_12		0	0	0	0.940184	0.821039	0.760313	0.938327	0.90143	0	1	1	0.84528	0.245119	0.979395	2015-09-16	2015-09-25 11:38:44	6.43109
640	01_red_delta_98_20		0	0	0	0.926845	0.697088	0.794564	0.872984	0.814804	0	1	1	0.897114	0.473635	0.953085	2015-09-16	2015-09-25 11:38:44	6.43012
571	01_red_delta_96_13		0	0	0	0.9327	0.736742	0.790189	0.864797	0.827377	0	1	1	0.92505	0.373839	0.977645	2015-09-16	2015-09-25 11:38:44	6.42834
634	01_red_delta_98_14		0	0	0	0.950832	0.669298	0.813719	0.838333	0.808699	0	1	1	0.90666	0.4765	0.962837	2015-09-16	2015-09-25 11:38:44	6.42688
462	01_red_delta_92_28		0	0	0	0.877826	0.783232	0.850458	0.963288	0.886227	0	1	1	0.712453	0.443375	0.909807	2015-09-16	2015-09-25 11:38:44	6.42667
588	01_red_delta_96_30		0	0	0	0.888044	0.676887	0.83316	0.902184	0.865197	0	1	1	0.894177	0.436163	0.929551	2015-09-16	2015-09-25 11:38:44	6.42536
490	01_red_delta_93_25		0	0	0	0.893624	0.655232	0.819064	0.964838	0.827162	0	1	1	0.84299	0.486323	0.926334	2015-09-16	2015-09-25 11:38:44	6.41557
11	01_non_red_49		0	0	0	0.940613	0.896766	0.836218	0.796853	0.729044	0	1	1	0.969222	0.904443	0.341504	2015-09-15	2015-09-25 11:38:44	6.41466
602	01_red_delta_97_13		0	0	0	0.940156	0.673377	0.924854	0.792183	0.788736	0	1	1	0.832386	0.519796	0.941226	2015-09-16	2015-09-25 11:38:44	6.41271
15	01_non_red_53		0	0	0	0.957046	0.891608	0.840965	0.76346	0.748481	0	1	1	0.959239	0.909347	0.34026	2015-09-15	2015-09-25 11:38:44	6.41041
530	01_red_delta_95_3		0	0	0	0.963614	0.834969	0.779285	0.864085	0.798251	0	1	1	0.978158	0.384964	0.805777	2015-09-16	2015-09-25 11:38:44	6.4091
488	01_red_delta_93_23		0	0	0	0.897618	0.762627	0.746284	0.950927	0.823822	0	1	1	0.889329	0.388879	0.942414	2015-09-16	2015-09-25 11:38:44	6.4019
568	01_red_delta_96_10		0	0	0	0.942039	0.744168	0.767096	0.934609	0.784902	0	1	1	0.963473	0.303043	0.952383	2015-09-16	2015-09-25 11:38:44	6.39171
550	01_red_delta_95_23		0	0	0	0.903002	0.752735	0.776647	0.955189	0.857577	0	1	1	0.797457	0.427708	0.916995	2015-09-16	2015-09-25 11:38:44	6.38731
616	01_red_delta_97_27		0	0	0	0.919797	0.712011	0.876267	0.899586	0.830565	0	1	1	0.735048	0.474049	0.935478	2015-09-16	2015-09-25 11:38:44	6.3828
18	01_non_red_56		0	0	0	0.966134	0.826879	0.856472	0.727926	0.80494	0	1	1	0.96162	0.910409	0.322645	2015-09-15	2015-09-25 11:38:44	6.37702
24	01_non_red_62		0	0	0	0.981695	0.773878	0.893317	0.770732	0.859043	0	1	1	0.967017	0.889245	0.235273	2015-09-15	2015-09-25 11:38:44	6.3702
581	01_red_delta_96_23		0	0	0	0.905099	0.709453	0.74893	0.94702	0.797514	0	1	1	0.904381	0.403112	0.95369	2015-09-16	2015-09-25 11:38:44	6.3692
575	01_red_delta_96_17		0	0	0	0.925366	0.801245	0.769098	0.864187	0.787416	0	1	1	0.840109	0.396466	0.967821	2015-09-16	2015-09-25 11:38:44	6.35171
19	01_non_red_57		0	0	0	0.964448	0.860681	0.818573	0.759209	0.836136	0	1	1	0.961759	0.875597	0.263769	2015-09-15	2015-09-25 11:38:44	6.34017
589	01_red_delta_97_0		0	0	0	0.980586	0.772229	0.854624	0.59553	0.697611	0	1	1	0.987329	0.793018	0.658533	2015-09-16	2015-09-25 11:38:44	6.33946
21	01_non_red_59		0	0	0	0.979058	0.785339	0.813568	0.846377	0.773317	0	1	1	0.960331	0.88287	0.296368	2015-09-15	2015-09-25 11:38:44	6.33723
20	01_non_red_58		0	0	0	0.971247	0.827798	0.808208	0.78971	0.780383	0	1	1	0.96915	0.879513	0.307383	2015-09-15	2015-09-25 11:38:44	6.33339
607	01_red_delta_97_18		0	0	0	0.927511	0.616251	0.738339	0.938392	0.798108	0	1	1	0.878626	0.446695	0.986213	2015-09-16	2015-09-25 11:38:44	6.33014
670	01_red_delta_99_19		0	0	0	0.945331	0.738936	0.772862	0.78377	0.674158	0	1	1	0.895081	0.579998	0.93612	2015-09-16	2015-09-25 11:38:44	6.32626
17	01_non_red_55		0	0	0	0.967377	0.847811	0.802786	0.808618	0.773838	0	1	1	0.960187	0.874431	0.28228	2015-09-15	2015-09-25 11:38:44	6.31733
12	01_non_red_50		0	0	0	0.953864	0.884857	0.796302	0.767758	0.731317	0	1	1	0.952521	0.888595	0.33593	2015-09-15	2015-09-25 11:38:44	6.31114
618	01_red_delta_97_29		0	0	0	0.895084	0.648152	0.810748	0.913654	0.810354	0	1	1	0.822459	0.460595	0.949688	2015-09-16	2015-09-25 11:38:44	6.31073
644	01_red_delta_98_24		0	0	0	0.903963	0.733984	0.748445	0.835296	0.846103	0	1	1	0.855814	0.44459	0.939009	2015-09-16	2015-09-25 11:38:44	6.3072
611	01_red_delta_97_22		0	0	0	0.929274	0.662944	0.809955	0.897249	0.715395	0	1	1	0.828574	0.517136	0.94075	2015-09-16	2015-09-25 11:38:44	6.30128
528	01_red_delta_95_1		0	0	0	0.976235	0.810712	0.800143	0.649128	0.709406	0	1	1	0.930471	0.77012	0.652235	2015-09-16	2015-09-25 11:38:44	6.29845
9	01_non_red_47		0	0	0	0.939628	0.872531	0.805064	0.739009	0.750323	0	1	1	0.958859	0.89164	0.336153	2015-09-15	2015-09-25 11:38:44	6.29321
642	01_red_delta_98_22		0	0	0	0.9318	0.520741	0.765909	0.867795	0.749886	0	1	1	0.986097	0.508058	0.960986	2015-09-16	2015-09-25 11:38:44	6.29127
628	01_red_delta_98_8		0	0	0	0.961977	0.807474	0.824872	0.684608	0.616201	0	1	1	0.914022	0.533111	0.948073	2015-09-16	2015-09-25 11:38:44	6.29034
7	01_non_red_45		0	0	0	0.927681	0.914109	0.805599	0.714672	0.740102	0	1	1	0.962112	0.88776	0.322695	2015-09-15	2015-09-25 11:38:44	6.27473
647	01_red_delta_98_27		0	0	0	0.919998	0.684634	0.786098	0.820922	0.813219	0	1	1	0.868988	0.435132	0.943449	2015-09-16	2015-09-25 11:38:44	6.27244
633	01_red_delta_98_13		0	0	0	0.956594	0.684755	0.784034	0.814548	0.633837	0	1	1	0.917909	0.485767	0.966899	2015-09-16	2015-09-25 11:38:44	6.24434
653	01_red_delta_99_2		0	0	0	0.978595	0.85954	0.850273	0.755757	0.493468	0	1	1	0.946347	0.774836	0.58064	2015-09-16	2015-09-25 11:38:44	6.23946
630	01_red_delta_98_10		0	0	0	0.957134	0.56537	0.902464	0.898689	0.640091	0	1	1	0.88324	0.431613	0.956631	2015-09-16	2015-09-25 11:38:44	6.23523
631	01_red_delta_98_11		0	0	0	0.954096	0.750251	0.695187	0.943025	0.639686	0	1	1	0.898246	0.351227	0.990836	2015-09-16	2015-09-25 11:38:44	6.22255
559	01_red_delta_96_1		0	0	0	0.966415	0.89146	0.787313	0.719844	0.701217	0	1	1	0.92968	0.355366	0.870934	2015-09-16	2015-09-25 11:38:44	6.22223
10	01_non_red_48		0	0	0	0.941295	0.889127	0.816431	0.72497	0.721851	0	1	1	0.960715	0.88201	0.283179	2015-09-15	2015-09-25 11:38:44	6.21958
632	01_red_delta_98_12		0	0	0	0.941394	0.687298	0.825437	0.839635	0.667347	0	1	1	0.967067	0.318492	0.972076	2015-09-16	2015-09-25 11:38:44	6.21875
8	01_non_red_46		0	0	0	0.937539	0.89142	0.801327	0.715854	0.712005	0	1	1	0.961613	0.882297	0.310383	2015-09-15	2015-09-25 11:38:44	6.21244
675	01_red_delta_99_24		0	0	0	0.926303	0.593405	0.756431	0.812326	0.805818	0	1	1	0.87256	0.47634	0.967223	2015-09-16	2015-09-25 11:38:44	6.21041
614	01_red_delta_97_25		0	0	0	0.898202	0.720668	0.75926	0.88658	0.787174	0	1	1	0.791894	0.434134	0.931935	2015-09-16	2015-09-25 11:38:44	6.20985
620	01_red_delta_98_0		0	0	0	0.97893	0.726907	0.897262	0.529578	0.645067	0	1	1	0.963925	0.794915	0.672646	2015-09-16	2015-09-25 11:38:44	6.20923
23	01_non_red_61		0	0	0	0.986829	0.782895	0.796049	0.810658	0.819966	0	1	1	0.970151	0.834956	0.204029	2015-09-15	2015-09-25 11:38:44	6.20553
648	01_red_delta_98_28		0	0	0	0.904606	0.625766	0.745934	0.875632	0.831428	0	1	1	0.85917	0.389399	0.95766	2015-09-16	2015-09-25 11:38:44	6.18959
650	01_red_delta_98_30		0	0	0	0.886935	0.672733	0.743046	0.879029	0.81192	0	1	1	0.900888	0.342634	0.944467	2015-09-16	2015-09-25 11:38:44	6.18165
659	01_red_delta_99_8		0	0	0	0.968952	0.853147	0.769356	0.749765	0.461459	0	1	1	0.904113	0.490417	0.977877	2015-09-16	2015-09-25 11:38:44	6.17509
586	01_red_delta_96_28		0	0	0	0.878406	0.617487	0.712484	0.910688	0.832283	0	1	1	0.942472	0.314993	0.946689	2015-09-16	2015-09-25 11:38:44	6.1555
625	01_red_delta_98_5		0	0	0	0.971396	0.653471	0.86121	0.620497	0.679415	0	1	1	0.933518	0.496928	0.935055	2015-09-16	2015-09-25 11:38:44	6.15149
609	01_red_delta_97_20		0	0	0	0.91067	0.639757	0.761409	0.925066	0.758147	0	1	1	0.820996	0.357413	0.970686	2015-09-16	2015-09-25 11:38:44	6.14414
673	01_red_delta_99_22		0	0	0	0.936404	0.608221	0.743852	0.811708	0.745046	0	1	1	0.908073	0.420602	0.968086	2015-09-16	2015-09-25 11:38:44	6.14199
619	01_red_delta_97_30		0	0	0	0.871716	0.781139	0.747878	0.874767	0.844658	0	1	1	0.746292	0.330933	0.943983	2015-09-16	2015-09-25 11:38:44	6.14137
678	01_red_delta_99_27		0	0	0	0.91407	0.711782	0.778738	0.84743	0.73574	0	1	1	0.780495	0.41137	0.957548	2015-09-16	2015-09-25 11:38:44	6.13717
597	01_red_delta_97_8		0	0	0	0.958114	0.62103	0.65863	0.972258	0.748452	0	1	1	0.927478	0.28369	0.964009	2015-09-16	2015-09-25 11:38:44	6.13366
25	01_non_red_63		0	0	0	0.977279	0.540588	0.857854	0.804874	0.865984	0	1	1	0.971765	0.875446	0.235589	2015-09-15	2015-09-25 11:38:44	6.12938
671	01_red_delta_99_20		0	0	0	0.934046	0.608372	0.651987	0.899517	0.675197	0	1	1	0.965051	0.41198	0.972139	2015-09-16	2015-09-25 11:38:44	6.11829
677	01_red_delta_99_26		0	0	0	0.921338	0.621593	0.784948	0.865116	0.761223	0	1	1	0.782715	0.433669	0.945923	2015-09-16	2015-09-25 11:38:44	6.11652
5	01_non_red_43		0	0	0	0.922452	0.916672	0.76789	0.699417	0.727177	0	1	1	0.94961	0.859258	0.273488	2015-09-15	2015-09-25 11:38:44	6.11597
635	01_red_delta_98_15		0	0	0	0.947163	0.668448	0.670883	0.82979	0.734878	0	1	1	0.828599	0.444254	0.98342	2015-09-16	2015-09-25 11:38:44	6.10743
643	01_red_delta_98_23		0	0	0	0.903462	0.591708	0.714395	0.849526	0.831813	0	1	1	0.852429	0.385881	0.97537	2015-09-16	2015-09-25 11:38:44	6.10459
672	01_red_delta_99_21		0	0	0	0.924494	0.64885	0.685397	0.829573	0.770511	0	1	1	0.880385	0.387238	0.975916	2015-09-16	2015-09-25 11:38:44	6.10236
641	01_red_delta_98_21		0	0	0	0.927621	0.662059	0.724352	0.874346	0.707039	0	1	1	0.857306	0.356869	0.981292	2015-09-16	2015-09-25 11:38:44	6.09088
617	01_red_delta_97_28		0	0	0	0.875286	0.686741	0.744768	0.888371	0.829515	0	1	1	0.7457	0.380302	0.935047	2015-09-16	2015-09-25 11:38:44	6.08573
649	01_red_delta_98_29		0	0	0	0.888486	0.65534	0.750095	0.889885	0.817942	0	1	1	0.755568	0.380278	0.942074	2015-09-16	2015-09-25 11:38:44	6.07967
22	01_non_red_60		0	0	0	0.981711	0.757962	0.803503	0.822711	0.776709	0	1	1	0.964533	0.821898	0.150025	2015-09-15	2015-09-25 11:38:44	6.07905
590	01_red_delta_97_1		0	0	0	0.974668	0.605561	0.671695	0.808059	0.843894	0	1	1	0.938448	0.412667	0.809386	2015-09-16	2015-09-25 11:38:44	6.06438
667	01_red_delta_99_16		0	0	0	0.940474	0.662668	0.675089	0.881603	0.725858	0	1	1	0.868988	0.318354	0.99072	2015-09-16	2015-09-25 11:38:44	6.06375
681	01_red_delta_99_30		0	0	0	0.902769	0.646421	0.732801	0.906463	0.813531	0	1	1	0.733768	0.397494	0.928794	2015-09-16	2015-09-25 11:38:44	6.06204
680	01_red_delta_99_29		0	0	0	0.895994	0.618081	0.737687	0.871342	0.777966	0	1	1	0.840592	0.362365	0.955877	2015-09-16	2015-09-25 11:38:44	6.0599
693	01_red_delta_100_11		0	0	0	0.97546	0.440539	0.891554	0.790126	0.507601	0	1	1	0.887094	0.60686	0.954749	2015-09-16	2015-09-25 11:38:44	6.05398
6	01_non_red_44		0	0	0	0.921349	0.895474	0.763722	0.706565	0.68701	0	1	1	0.957234	0.8529	0.267558	2015-09-15	2015-09-25 11:38:44	6.05181
4	01_non_red_42		0	0	0	0.925242	0.890941	0.742697	0.725827	0.696631	0	1	1	0.951071	0.843812	0.267068	2015-09-15	2015-09-25 11:38:44	6.04329
637	01_red_delta_98_17		0	0	0	0.936305	0.59933	0.697287	0.789963	0.737758	0	1	1	0.900241	0.386456	0.983731	2015-09-16	2015-09-25 11:38:44	6.03107
3	01_non_red_41		0	0	0	0.909514	0.899101	0.774867	0.700106	0.644156	0	1	1	0.950825	0.863048	0.275036	2015-09-15	2015-09-25 11:38:44	6.01665
679	01_red_delta_99_28		0	0	0	0.898123	0.616558	0.675706	0.87384	0.800767	0	1	1	0.824567	0.371867	0.947622	2015-09-16	2015-09-25 11:38:44	6.00905
26	01_non_red_64		0	0	0	0.986533	0.518398	0.867813	0.818593	0.854195	0	1	1	0.968046	0.839856	0.14589	2015-09-15	2015-09-25 11:38:44	5.99932
2	01_non_red_40		0	0	0	0.910685	0.913186	0.736514	0.689637	0.696112	0	1	1	0.95252	0.836125	0.25325	2015-09-15	2015-09-25 11:38:44	5.98803
665	01_red_delta_99_14		0	0	0	0.945218	0.692209	0.597258	0.823201	0.694982	0	1	1	0.918424	0.331185	0.980791	2015-09-16	2015-09-25 11:38:44	5.98327
565	01_red_delta_96_7		0	0	0	0.95604	0.609468	0.736046	0.655878	0.815471	0	1	1	0.973893	0.337099	0.898874	2015-09-16	2015-09-25 11:38:44	5.98277
646	01_red_delta_98_26		0	0	0	0.890486	0.688613	0.682721	0.869681	0.779816	0	1	1	0.790576	0.309577	0.964571	2015-09-16	2015-09-25 11:38:44	5.97604
692	01_red_delta_100_10		0	0	0	0.961327	0.680038	0.578195	0.786504	0.74707	0	1	1	0.8525	0.375741	0.986971	2015-09-16	2015-09-25 11:38:44	5.96835
711	01_red_delta_100_29		0	0	0	0.913542	0.58175	0.668872	0.864893	0.76352	0	1	1	0.868144	0.342149	0.934977	2015-09-16	2015-09-25 11:38:44	5.93785
592	01_red_delta_97_3		0	0	0	0.96807	0.70641	0.679755	0.818766	0.651199	0	1	1	0.993151	0.207077	0.909876	2015-09-16	2015-09-25 11:38:44	5.9343
661	01_red_delta_99_10		0	0	0	0.960605	0.789358	0.644031	0.735796	0.575025	0	1	1	0.89868	0.34264	0.984679	2015-09-16	2015-09-25 11:38:44	5.93081
639	01_red_delta_98_19		0	0	0	0.912885	0.737181	0.545413	0.848774	0.742453	0	1	1	0.922966	0.248725	0.972031	2015-09-16	2015-09-25 11:38:44	5.93043
664	01_red_delta_99_13		0	0	0	0.953303	0.548144	0.717897	0.845381	0.604921	0	1	1	0.868569	0.4024	0.987064	2015-09-16	2015-09-25 11:38:44	5.92768
674	01_red_delta_99_23		0	0	0	0.911727	0.685658	0.628157	0.831354	0.686443	0	1	1	0.896098	0.288482	0.99016	2015-09-16	2015-09-25 11:38:44	5.91808
636	01_red_delta_98_16		0	0	0	0.915765	0.612204	0.616912	0.833457	0.810064	0	1	1	0.889888	0.195415	0.988175	2015-09-16	2015-09-25 11:38:44	5.86188
656	01_red_delta_99_5		0	0	0	0.96771	0.855673	0.601299	0.581864	0.487432	0	1	1	0.939471	0.457206	0.961654	2015-09-16	2015-09-25 11:38:44	5.85231
704	01_red_delta_100_22		0	0	0	0.934842	0.578265	0.609781	0.805561	0.711135	0	1	1	0.875201	0.32837	0.988805	2015-09-16	2015-09-25 11:38:44	5.83196
710	01_red_delta_100_28		0	0	0	0.912596	0.624364	0.600008	0.828652	0.693997	0	1	1	0.881602	0.318084	0.964364	2015-09-16	2015-09-25 11:38:44	5.82367
707	01_red_delta_100_25		0	0	0	0.911592	0.592448	0.691457	0.82905	0.721952	0	1	1	0.79208	0.309437	0.97198	2015-09-16	2015-09-25 11:38:44	5.82
666	01_red_delta_99_15		0	0	0	0.936523	0.664146	0.584047	0.862349	0.616147	0	1	1	0.85888	0.303228	0.989849	2015-09-16	2015-09-25 11:38:44	5.81517
705	01_red_delta_100_23		0	0	0	0.927858	0.593813	0.5937	0.734663	0.751155	0	1	1	0.875047	0.34309	0.991207	2015-09-16	2015-09-25 11:38:44	5.81053
669	01_red_delta_99_18		0	0	0	0.925607	0.672397	0.535923	0.842512	0.708247	0	1	1	0.851121	0.28011	0.986859	2015-09-16	2015-09-25 11:38:44	5.80277
660	01_red_delta_99_9		0	0	0	0.961874	0.757463	0.57205	0.7301	0.543395	0	1	1	0.956066	0.274449	0.975063	2015-09-16	2015-09-25 11:38:44	5.77046
701	01_red_delta_100_19		0	0	0	0.931462	0.694172	0.542232	0.782673	0.666217	0	1	1	0.849469	0.301294	0.990749	2015-09-16	2015-09-25 11:38:44	5.75827
658	01_red_delta_99_7		0	0	0	0.96943	0.393526	0.698347	0.570646	0.650166	0	1	1	0.966399	0.528988	0.96163	2015-09-16	2015-09-25 11:38:44	5.73913
706	01_red_delta_100_24		0	0	0	0.916949	0.568118	0.607964	0.809576	0.757009	0	1	1	0.801714	0.299788	0.97784	2015-09-16	2015-09-25 11:38:44	5.73896
28	01_non_red_66		0	0	0	0.988724	0.191971	0.877166	0.874854	0.886551	0	1	1	0.973185	0.818436	0.111717	2015-09-15	2015-09-25 11:38:44	5.72261
621	01_red_delta_98_1		0	0	0	0.974752	0.855549	0.732977	0.482992	0.681296	0	1	1	0.89751	0.660337	0.42319	2015-09-16	2015-09-25 11:38:44	5.7086
676	01_red_delta_99_25		0	0	0	0.895777	0.559976	0.59813	0.852845	0.705165	0	1	1	0.867906	0.247769	0.978946	2015-09-16	2015-09-25 11:38:44	5.70651
696	01_red_delta_100_14		0	0	0	0.954602	0.505908	0.739095	0.665977	0.578193	0	1	1	0.868382	0.405083	0.9828	2015-09-16	2015-09-25 11:38:44	5.70004
709	01_red_delta_100_27		0	0	0	0.901256	0.64989	0.567953	0.81028	0.785477	0	1	1	0.741029	0.253372	0.974189	2015-09-16	2015-09-25 11:38:44	5.68344
626	01_red_delta_98_6		0	0	0	0.960929	0.435748	0.693645	0.853332	0.698488	0	1	1	0.891055	0.165974	0.961862	2015-09-16	2015-09-25 11:38:44	5.66103
695	01_red_delta_100_13		0	0	0	0.950488	0.596991	0.610046	0.744731	0.586572	0	1	1	0.863482	0.310035	0.995721	2015-09-16	2015-09-25 11:38:44	5.65807
27	01_non_red_65		0	0	0	0.987931	0.293753	0.8806	0.825861	0.841035	0	1	1	0.96463	0.795552	0.0562567	2015-09-15	2015-09-25 11:38:44	5.64562
694	01_red_delta_100_12		0	0	0	0.9613	0.535652	0.605001	0.793071	0.45152	0	1	1	0.881217	0.419318	0.977431	2015-09-16	2015-09-25 11:38:44	5.62451
662	01_red_delta_99_11		0	0	0	0.954687	0.730715	0.559947	0.727069	0.631408	0	1	1	0.838594	0.212191	0.969325	2015-09-16	2015-09-25 11:38:44	5.62393
698	01_red_delta_100_16		0	0	0	0.947509	0.556342	0.588542	0.720653	0.53883	0	1	1	0.918249	0.372333	0.977711	2015-09-16	2015-09-25 11:38:44	5.62017
699	01_red_delta_100_17		0	0	0	0.932647	0.562557	0.55793	0.789513	0.644234	0	1	1	0.881796	0.263274	0.968529	2015-09-16	2015-09-25 11:38:44	5.60048
651	01_red_delta_99_0		0	0	0	0.983668	0.787236	0.656648	0.369339	0.490928	0	1	1	0.943019	0.908046	0.42278	2015-09-16	2015-09-25 11:38:44	5.56166
703	01_red_delta_100_21		0	0	0	0.917925	0.44099	0.594691	0.820139	0.737298	0	1	1	0.787613	0.23824	0.985372	2015-09-16	2015-09-25 11:38:44	5.52227
668	01_red_delta_99_17		0	0	0	0.918072	0.557848	0.549759	0.897664	0.687862	0	1	1	0.68862	0.213111	0.983055	2015-09-16	2015-09-25 11:38:44	5.49599
697	01_red_delta_100_15		0	0	0	0.943485	0.717281	0.476528	0.804269	0.642908	0	1	1	0.770259	0.168966	0.962644	2015-09-16	2015-09-25 11:38:44	5.48634
712	01_red_delta_100_30		0	0	0	0.882172	0.571243	0.56636	0.805519	0.726066	0	1	1	0.730308	0.274595	0.929711	2015-09-16	2015-09-25 11:38:44	5.48597
654	01_red_delta_99_3		0	0	0	0.973936	0.694417	0.467422	0.562877	0.589292	0	1	1	0.887	0.42353	0.854093	2015-09-16	2015-09-25 11:38:44	5.45257
702	01_red_delta_100_20		0	0	0	0.915732	0.463057	0.512393	0.81982	0.673686	0	1	1	0.848348	0.225266	0.991567	2015-09-16	2015-09-25 11:38:44	5.44987
708	01_red_delta_100_26		0	0	0	0.890731	0.617252	0.531788	0.840982	0.680629	0	1	1	0.716933	0.156149	0.974774	2015-09-16	2015-09-25 11:38:44	5.40924
655	01_red_delta_99_4		0	0	0	0.97042	0.22457	0.657567	0.580857	0.605098	0	1	1	0.936471	0.50234	0.885943	2015-09-16	2015-09-25 11:38:44	5.36327
657	01_red_delta_99_6		0	0	0	0.968939	0.686558	0.554187	0.632872	0.514868	0	1	1	0.863144	0.227503	0.907339	2015-09-16	2015-09-25 11:38:44	5.35541
700	01_red_delta_100_18		0	0	0	0.933878	0.51008	0.466559	0.722345	0.660011	0	1	1	0.816587	0.19838	0.994157	2015-09-16	2015-09-25 11:38:44	5.302
29	01_non_red_67		0	0	0	0.992598	0.24726	0.799084	0.814063	0.881587	0	1	1	0.967056	0.676124	-0.0942825	2015-09-15	2015-09-25 11:38:44	5.28349
691	01_red_delta_100_9		0	0	0	0.963195	0.398261	0.660658	0.693208	0.33407	0	1	1	0.928488	0.279373	0.993122	2015-09-16	2015-09-25 11:38:44	5.25038
688	01_red_delta_100_6		0	0	0	0.96624	0.533846	0.446649	0.695867	0.459854	0	1	1	0.941848	0.199409	0.985124	2015-09-16	2015-09-25 11:38:44	5.22884
30	01_non_red_68		0	0	0	0.989493	-0.00801156	0.889728	0.893171	0.856924	0	1	1	0.96724	0.706918	-0.0718899	2015-09-15	2015-09-25 11:38:44	5.22357
32	01_non_red_70		0	0	0	0.98977	0.10919	0.868468	0.83695	0.829397	0	1	1	0.959663	0.67996	-0.11527	2015-09-15	2015-09-25 11:38:44	5.15813
31	01_non_red_69		0	0	0	0.989598	-0.0803728	0.873516	0.838641	0.82884	0	1	1	0.973319	0.736993	-0.02091	2015-09-15	2015-09-25 11:38:44	5.13962
690	01_red_delta_100_8		0	0	0	0.965839	0.262522	0.411734	0.657783	0.433799	0	1	1	0.857763	0.242451	0.99178	2015-09-16	2015-09-25 11:38:44	4.82367
622	01_red_delta_98_2		0	0	0	0.970536	0.777238	0.119142	0.747204	0.567473	0	1	1	0.94097	-0.202958	0.861184	2015-09-16	2015-09-25 11:38:44	4.78079
33	01_non_red_71		0	0	0	0.990133	-0.209326	0.895013	0.824925	0.862552	0	1	1	0.974538	0.582377	-0.211183	2015-09-15	2015-09-25 11:38:44	4.70903
34	01_non_red_72		0	0	0	0.9902	-0.00514165	0.870777	0.792955	0.883352	0	1	1	0.962807	0.512795	-0.299864	2015-09-15	2015-09-25 11:38:44	4.70788
689	01_red_delta_100_7		0	0	0	0.966314	0.316617	0.188856	0.561072	0.663988	0	1	1	0.938903	0.0232309	0.973322	2015-09-16	2015-09-25 11:38:44	4.6323
685	01_red_delta_100_3		0	0	0	0.972097	0.263914	0.267818	0.42584	0.299251	0	1	1	0.92027	0.382436	0.942319	2015-09-16	2015-09-25 11:38:44	4.47395
687	01_red_delta_100_5		0	0	0	0.97153	0.227938	0.444503	0.615438	-0.00588313	0	1	1	0.928434	0.242044	0.99031	2015-09-16	2015-09-25 11:38:44	4.41431
686	01_red_delta_100_4		0	0	0	0.971963	-0.0653697	0.393022	0.45683	0.527768	0	1	1	0.88837	0.00452912	0.996448	2015-09-16	2015-09-25 11:38:44	4.17356
35	01_non_red_73		0	0	0	0.988931	-0.333531	0.893292	0.851742	0.872058	0	1	1	0.977729	0.332245	-0.424041	2015-09-15	2015-09-25 11:38:44	4.15843
652	01_red_delta_99_1		0	0	0	0.969931	0.493262	-0.489539	0.523093	0.501931	0	1	1	0.905173	-0.209833	0.83517	2015-09-16	2015-09-25 11:38:44	3.52919
37	01_non_red_75		0	0	0	0.982914	-0.45861	0.808214	0.846914	0.897386	0	1	1	0.944436	0.048984	-0.666014	2015-09-15	2015-09-25 11:38:44	3.40422
36	01_non_red_74		0	0	0	0.984815	-0.398388	0.817174	0.720899	0.887788	0	1	1	0.964555	0.0558378	-0.660285	2015-09-15	2015-09-25 11:38:44	3.3724
38	01_non_red_76		0	0	0	0.977482	-0.531152	0.763864	0.752494	0.89478	0	1	1	0.949164	-0.120487	-0.758957	2015-09-15	2015-09-25 11:38:44	2.92719
40	01_non_red_78		0	0	0	0.976275	-0.529014	0.757959	0.838982	0.833538	0	1	1	0.971116	-0.172751	-0.766944	2015-09-15	2015-09-25 11:38:44	2.90916
39	01_non_red_77		0	0	0	0.976489	-0.520044	0.710066	0.726363	0.854986	0	1	1	0.944341	-0.12931	-0.786628	2015-09-15	2015-09-25 11:38:44	2.77626
682	01_red_delta_100_0		0	0	0	0.985429	0.38918	0.366706	0.0857716	0.311039	0	1	1	0.919367	0.140713	-0.631231	2015-09-16	2015-09-25 11:38:44	2.56697
41	01_non_red_79		0	0	0	0.96577	-0.555797	0.703154	0.72163	0.853946	0	1	1	0.953839	-0.265489	-0.811365	2015-09-15	2015-09-25 11:38:44	2.56569
42	01_non_red_80		0	0	0	0.965296	-0.614741	0.741699	0.689584	0.809988	0	1	1	0.973862	-0.272006	-0.781265	2015-09-15	2015-09-25 11:38:44	2.51242
683	01_red_delta_100_1		0	0	0	0.968823	0.313772	-0.42809	0.121003	0.431033	0	1	1	0.933518	-0.522952	0.565808	2015-09-16	2015-09-25 11:38:44	2.38291
684	01_red_delta_100_2		0	0	0	0.976131	0.197126	-0.428529	0.587964	0.116269	0	1	1	0.914068	-0.609782	0.406247	2015-09-16	2015-09-25 11:38:44	2.15949
44	01_non_red_82		0	0	0	0.96194	-0.63999	0.588405	0.662269	0.811275	0	1	1	0.943678	-0.353182	-0.844208	2015-09-15	2015-09-25 11:38:44	2.13019
43	01_non_red_81		0	0	0	0.958074	-0.638065	0.568	0.671199	0.795283	0	1	1	0.957418	-0.374062	-0.846907	2015-09-15	2015-09-25 11:38:44	2.09094
45	01_non_red_83		0	0	0	0.950881	-0.637948	0.510302	0.6655	0.766332	0	1	1	0.974047	-0.415872	-0.84363	2015-09-15	2015-09-25 11:38:44	1.96961
46	01_non_red_84		0	0	0	0.949248	-0.629933	0.503272	0.626996	0.767891	0	1	1	0.951412	-0.413512	-0.856796	2015-09-15	2015-09-25 11:38:44	1.89858
47	01_non_red_85		0	0	0	0.933637	-0.678391	0.384855	0.594969	0.731364	0	1	1	0.952439	-0.463652	-0.869323	2015-09-15	2015-09-25 11:38:44	1.5859
48	01_non_red_86		0	0	0	0.920457	-0.659242	0.429771	0.415644	0.72175	0	-1	1	0.982306	-0.464713	-0.83706	2015-09-15	2015-09-25 11:38:44	1.50891
49	01_non_red_87		0	0	0	0.909959	-0.68984	0.447752	0.44147	0.593939	0	-1	1	0.973028	-0.459122	-0.84338	2015-09-15	2015-09-25 11:38:44	1.37381
50	01_non_red_88		0	0	0	0.879012	-0.715518	0.202521	0.24755	0.632487	0	-1	1	0.989926	-0.52898	-0.849853	2015-09-15	2015-09-25 11:38:44	0.857145
51	01_non_red_89		0	0	0	0.873319	-0.690725	0.111863	0.290921	0.571721	0	-1	1	0.930804	-0.54271	-0.882206	2015-09-15	2015-09-25 11:38:44	0.662988
52	01_non_red_90		0	0	0	0.863606	-0.729789	0.137477	0.278065	0.410257	0	-1	1	0.938812	-0.538145	-0.878403	2015-09-15	2015-09-25 11:38:44	0.48188
53	01_non_red_91		0	0	0	0.833849	-0.716478	0.0583311	0.333796	0.416808	0	-1	1	0.937021	-0.557448	-0.874433	2015-09-15	2015-09-25 11:38:44	0.431446
54	01_non_red_92		0	0	0	0.817015	-0.683761	0.0556944	0.246041	0.385064	0	-1	1	0.913698	-0.556345	-0.881198	2015-09-15	2015-09-25 11:38:44	0.296208
56	01_non_red_94		0	0	0	0.807299	-0.708518	0.0603253	0.236354	0.351753	0	-1	1	0.929506	-0.556565	-0.876843	2015-09-15	2015-09-25 11:38:44	0.243312
55	01_non_red_93		0	0	0	0.800789	-0.715275	0.0807851	0.128065	0.318171	0	-1	1	0.962212	-0.55475	-0.865611	2015-09-15	2015-09-25 11:38:44	0.154386
58	01_non_red_96		0	0	0	0.748194	-0.714566	0.115685	0.131555	0.337726	0	-1	1	0.933518	-0.544413	-0.879038	2015-09-15	2015-09-25 11:38:44	0.12866
57	01_non_red_95		0	0	0	0.759866	-0.720127	0.0890837	0.134481	0.32585	0	-1	1	0.924227	-0.550562	-0.877237	2015-09-15	2015-09-25 11:38:44	0.0855822
59	01_non_red_97		0	0	0	0.726393	-0.726025	0.00549363	0.150107	0.309416	0	-1	1	0.97569	-0.568828	-0.873918	2015-09-15	2015-09-25 11:38:44	-0.00167157
60	01_non_red_98		0	0	0	0.702906	-0.710586	0.0415782	0.0926802	0.25152	0	-1	1	0.951027	-0.561579	-0.873524	2015-09-15	2015-09-25 11:38:44	-0.105978
61	01_non_red_99		0	0	0	0.691113	-0.716369	0.0209601	0.0633738	0.260442	0	-1	1	0.906505	-0.565778	-0.873149	2015-09-15	2015-09-25 11:38:44	-0.212903
